# Supplementary material for: Genome-wide analysis identifies novel susceptibility loci for heart failure and nonischemic cardiomyopathy subtype
Source: Research Square preprint supplement (doi:10.21203/rs.3.rs-4539882/v1), 2024-08-02
Supplement: Supplementary file 1 [file bb1a89dd7845d984642f904a.xlsx]

## Sheet: Supplementary Table Description
Title: Table S1.
Description: Description of datasets used for GWAS meta-analysis for Heart failure (HF) and nonischemic cardiomyopathy (NICM).
Title: Table S2.
Description: 5 loci identified for heart failure in meta-analysis of the China PEACE 5p-HF/ChinaHEART and Biobank Japan.
Title: Table S3.
Description: Replication of previously reported loci for heart failure.
Title: Table S4.
Description: 2 loci identified for heart failure in the male-specific meta-analysis of the China PEACE 5p-HF/ChinaHEART and Biobank Japan.
Title: Table S5.
Description: Combined and sex-stratified results for 5 loci identified for heart failure in meta-analysis of the China PEACE 5p-HF/ChinaHEART and Biobank Japan.
Title: Table S6.
Description: 3 loci identified for non-ischemic cardiomyopathy (NICM) in meta-analysis of the China PEACE 5p-HF/ChinaHEART and the UK Biobank.
Title: Table S7.
Description: Association of 5 novel HF loci with HF risk factors in literature.
Title: Table S8.
Description: Association of 5 novel HF loci with cardiac magnetic resonance imaging (MRI)-derived left ventricular measure in the UK Biobank.
Title: Table S9.
Description: Results of Data-driven Expression-Prioritized Integration for Complex Traits (DEPICT) gene set enrichment analysis with SNPs significantly (FDR<0.05) associated with heart failure in GWAS meta-analysis of the China PEACE 5p-HF/ChinaHEART and Biobank Japan.
Title: Table S10.
Description: Results of Data-driven Expression-Prioritized Integration for Complex Traits (DEPICT) tissue enrichment analysis with SNPs significantly (FDR<0.05) associated with heart failure in GWAS meta-analysis of the China PEACE 5p-HF/ChinaHEART and Biobank Japan.
Title: Table S11.
Description: Multi-tissue expression quantitative trait Locus (eQTLs) at 5 novel HF loci.
Title: Table S12.
Description: Multi-tissue splice quantitative trait locus (sQTLs) at 5 novel HF loci from the GTEx project (version 8).
Title: Table S13.
Description: Differentially expressed genes (DEG) between SVIL knock down and controls in H9C2 cells.
Title: Table S14.
Description: Significantly enriched pathways from Gene Ontology (GO) analysis.
Title: Table S15.
Description: Sample quality control procedures performed for the China PEACE 5p-HF/ChinaHEART.
Title: Table S16.
Description: SNP quality control procedures performed for the China PEACE 5p-HF/ChinaHEART.

## Sheet: S1
Table S1. Description of datasets used for GWAS meta-analysis for Heart failure (HF) and nonischemic cardiomyopathy (NICM).
Cohort	N	Cases/Controls	Phenotype Definition	SNPs Included	Ancestry	Country of Residence	Age range, years, mean (standard deviation)	Male gender, (%)
Meta-analysis for HF
the China PEACE 5p-HF/ChinaHEART	15143	Male: 2,515/4,170 Female: 1,457/7,001 Combined: 3,972/11,171	Cases included participants with a clinical diagnosis of HF and without a diagnosis of hypertrophic cardiomyopathy. Controls were participants without HF and CVD.	6976826	Chinese	China	cases: 65.2 (13.6) controls: 56.9 (10.0)	cases: 63.3% controls: 37.3%
Biobank Japan	212453	Male: 5,904/103,443 Female: 3,509/99,597 Combined: 9,413/203,040	Congestive heart failure	8678731	Japenese	Japan	cases: 68.7 (12.2) controls: 61.7 (13.7)	cases: 62.7% controls: 50.9%
Meta-analysis for NICM
the China PEACE 5p-HF/ChinaHEART	12958	1,787/11,171	Cases included participants with a clinical diagnosis of HF and without a diagnosis of hypertrophic cardiomyopathy, AMI, CHD and ischemic cardiomyopathy. Controls were participants without HF and CVD.	6976826	Chinese	China	cases: 60.2 (15.0) controls: 56.9 (10.0)	cases: 62.8% controls: 37.3%
The UK Biobank	390142	1,816/388,326	Among all-cause HF patients, “nonischemic cardiomyopathy” (NICM) were defined base on the basis of left ventricular dysfunction and absence of coronary artery disease (CAD).	7736182	European	UK	cases: 61.6 (6.7) controls: 57.0 (8.1)	cases: 65.0% controls: 45.4%

## Sheet: S2
Table S2. 5 loci identified for heart failure in meta-analysis of the China PEACE 5p-HF/ChinaHEART and Biobank Japan.
Number in parentheses indaicate number of cases/controls.
CHR, chromosome; BP, base pair position (hg19); EA, effect allele; NEA, non-effect allele; EAF, effect allele frequency; OR, odds ratio; 95L, lower 95% confidence interval; 95U, upper 95% confidence interval;
*EAF is from controls in Biobank Japan.
					Meta-analysis (13,385/214,211)							the China PEACE 5p-HF/ChinaHEART (3,972/11,171)					BBJ (9,413/203,040)
Locus	SNP	CHR	BP	Gene	EA	NEA	OR	95L	95U	P	P_het	EAF	OR	95L	95U	P	EAF*	OR	95L	95U	P	Previously Identified? (Trait)	PMID
1	rs17076	2q31.2	179595117	TTN	C	G	1.09046	1.06032	1.12146	1.199e-09	0.1172	0.3194	1.13933	1.07138	1.2116	3.21833e-05	0.347578	1.07817	1.04489	1.11251	2.53316e-06	No
2	rs2129981	4q25	111704199	PITX2	T	G	1.09505	1.06645	1.12441	1.515e-11	0.5956	0.5161	1.11011	1.04854	1.1753	0.000333012	0.450123	1.09094	1.05898	1.12386	9.59542e-09	Heart failure	31919418
3	rs9462210	6p21.2	36628953	CDKN1A	G	A	1.12817	1.08502	1.17305	1.388e-09	0.07443	0.8346	1.20093	1.1097	1.29967	5.57427e-06	0.872871	1.10561	1.05711	1.15634	1.15349e-05	Heart failure	31919418
4	rs12542527	8q24.13	125876444	MTSS1	A	G	1.07832	1.05016	1.10723	2.597e-08	0.3317	0.6101	1.10667	1.04344	1.17373	0.000733375	0.505027	1.07113	1.03976	1.10345	5.87933e-06	No
5	rs139616510	11p11.2	47266755	MYBPC3	T	C	1.74177	1.43963	2.10731	1.151e-08	0.1767	0.005285	2.1611	1.4981	3.11754	3.75661e-05	0.00521107	1.60782	1.28629	2.00973	3.02442e-05	No

## Sheet: S3
Table S3. Replication of previously reported loci for heart failure.
EA, effect allele; NEA, Non-effect allele; OR, odds ratio; HR, hazards ratio (for incident heart failure analysis); CI, confidence interval.
Associaitons with P≤ Bonferroni-corrected threshold for testing 57 loci (P=0.05/57=8.8E-04) are shown in bold.
Locus	SNP	CHR	BP (hg19)	Nearest Gene	EA/NEA	Previously Reported			Meta-analysis for HF (13,385/214,211)					Previously reported traits	N cases / incidence	PMID
						OR / HR	95% CI	P	CHR	BP	SNP	P	Distance
1	rs28579893	1	16347534	CLCNKA	G/A	1.03427	1.02-1.05	6.564e-09	1	15584347	rs76289560	0.0008699	-763187	Heart failure	115150	36376295
2	rs80061532	1	51797794	TTC39A	G/C	1.10429	1.07-1.14	3.191e-08	1	52266242	rs8375	0.001877	468448	Heart failure	115150	36376295
3	rs1997997	1	61886046	NFIA	A/G	1.03686	1.02-1.05	4.563e-08	1	61791554	rs12742828	0.000581	-94492	Heart failure	115150	36376295
4	rs79682748	1	66989719	SGIP1	A/G	1.17	1.11-1.23	3e-08	1	67076437	rs35393120	0.01084	86718	Heart failure	90653	37429843
5	rs660240	1	109817838	CELSR2	C/T	1.06	1.04-1.08	3.25e-10	1	109073613	rs112943900	0.0008982	-744225	Heart failure	47309	31919418
6	rs17163345	1	222806218	MIA3	A/G	1.03	1.02-1.05	2.15e-08	1	223213967	rs946511	0.0003778	407749	Heart failure	90653	37429843
7	rs580698	1	236841281	ACTN2	A/G	1.13883	1.10-1.18	4.49e-08	1	236827756	rs1768050	0.0003316	-13525	Heart failure	10976	32111823
8	rs73139123	2	630075	TMEM18	T/C	1.03956	1.03-1.05	2.346e-08	2	755718	rs11691064	4.869e-05	125643	Heart failure	115150	36376295
9	rs7605601	2	37147975	STRN	T/G	1.03159	1.02-1.04	5.937e-10	2	36657305	rs888074	0.001509	-490670	Heart failure	115150	36376295
10	rs1016287	2	59305625	FANCL	C/T	1.04	1.03-1.05	1.11e-08	2	59830646	rs76135953	0.001104	525021	Heart failure	90653	37429843
11	rs4832298	2	86764004	CHMP3	C/T	1.03562	1.02-1.05	1.557e-08	2	87058953	rs56147721	0.004379	294949	Heart failure	115150	36376295
12	rs7564469	2	145258445	ZEB2	T/C	1.04	1.03-1.06	6.66e-09	2	146122776	rs72861745	0.008623	864331	Heart failure	90653	37429843
13	rs3820888	2	201180023	SPATS2L	T/C	1.03	1.02-1.05	1.2e-09	2	201273580	rs13024020	9.62e-06	93557	Heart failure	90653	37429843
14	rs138178446	4	20926794	KCNIP4	T/C	1.67548	1.39-2.01	3.728e-08	4	21446999	rs539841042	0.001662	520205	Heart failure	115150	36376295
15	rs10938398	4	45186139	GNPDA2	A/G	1.03832	1.03-1.05	1.9e-13	4	44365249	rs16856862	0.002839	-820890	Heart failure	115150	36376295
16	rs233806	4	103212846	SLC39A8	T/C	1.04	1.02-1.05	1.57e-08	4	103270070	rs922361	0.0001497	57224	Heart failure	90653	37429843
17	rs1906592	4	111709004	PITX2	G/T	1.08643	1.07-1.10	2.826e-35	4	111704199	rs2129981	1.515e-11	-4805	Heart failure	115150	36376295
18	rs17620390	4	114384328	CAMK2D	A/C	1.04	1.03-1.05	1.9e-09	4	114978131	rs7659641	0.0005352	593803	Heart failure	90653	37429843
19	rs541744150	5	85578192	COX7C	A/AG	1.4878	1.29-1.71	2.06e-08	5	86006026	rs377747231	0.0006288	427834	Heart failure	115150	36376295
20	rs11745324	5	137012171	KLHL3	G/A	1.05	1.03-1.07	2.35e-08	5	136540002	rs57017295	0.0007462	-472169	Heart failure	47309	31919418
21	rs9349379	6	12903957	PHACTR1	A/G	1.03	1.02-1.04	2.58e-08	6	12894904	rs9296512	0.004964	-9053	Heart failure	90653	37429843
22	rs3734214	6	22571414	HDGFL1	G/C	1.03221	1.02-1.04	6.027e-09	6	22621828	rs9348528	1.275e-05	50414	Heart failure	115150	36376295
23	rs4135240	6	36647680	CDKN1A	T/C	1.05	1.03-1.07	6.84e-09	6	36628953	rs9462210	1.388e-09	-18727	Heart failure	47309	31919418
24	rs9361413	6	79345249	IRAK1BP1	G/A	1.03128	1.02-1.04	7.246e-09	6	78644024	rs181881911	0.01021	-701225	Heart failure	115150	36376295
25	rs55730499	6	161005610	LPA	T/C	1.11	1.08-1.14	1.83e-11	6	160751101	rs316164	0.000244	-254509	Heart failure	47309	31919418
26	rs6944634	7	75061769	POM121C	G/C	1.04071	1.03-1.06	1.716e-08	7	76046898	rs11983026	0.008707	985129	Heart failure	115150	36376295
27	rs2282979	7	92264993	FAM133B	T/C	1.03262	1.02-1.04	4.504e-08	7	92434610	rs142151449	0.0004431	169617	Heart failure	115150	36376295
28	rs150966198	7	103886218	ORC5	G/T	1.44311	1.28-1.63	5.447e-09	7	103643864	rs187359045	0.0009895	-242354	Heart failure	115150	36376295
29	rs117540300	7	143813353	OR2A2	A/C	1.10495	1.07-1.14	1.302e-08	7	143614736	rs2368058	0.02441	-198617	Heart failure	115150	36376295
30	rs7859727	9	22102165	CDKN2B	T/C	1.04404	1.03-1.05	1.022e-17	9	22132076	rs2383208	0.0008211	29911	Heart failure	115150	36376295
31	rs600038	9	136151806	ABO	C/T	1.06	1.04-1.08	3.68e-09	9	135298917	rs1412272	0.0004048	-852889	Heart failure	47309	31919418
32	rs1757223	10	18514999	CACNB2	G/A	1.03355	1.02-1.05	1.816e-08	10	18716815	rs1300272417	0.0005285	201816	Heart failure	115150	36376295
33	rs4746140	10	75417249	SYNPO2L	G/C	1.07	1.05-1.09	1.1e-09	10	75514921	rs180966618	8.603e-05	97672	Heart failure	47309	31919418
34	rs17617337	10	121426884	BAG3	C/T	1.06	1.04-1.08	3.65e-09	10	121440473	rs35600085	1.314e-07	13589	Heart failure	47309	31919418
34	rs2234962	10	121429633	BAG3	T/C	1.3	1.19–1.41	2.32e-09	10	121440473	rs35600085	1.314e-07	10840	Nonischemic cardiomyopathy	1816	30586722
35	rs7936836	11	43633645	HSD17B12	C/A	1.03169	1.02-1.04	1.457e-08	11	43425412	rs16937487	0.000498	-208233	Heart failure	115150	36376295
36	rs7977247	12	107259470	RIC8B	C/T	1.03	1.02-1.04	1.07e-08	12	106722466	rs34762209	0.0002843	-537004	Heart failure	90653	37429843
37	rs4766578	12	111904371	ATXN2	T/A	1.04	1.03-1.06	4.9e-08	12	112827169	rs148885639	0.0001909	922798	Heart failure	47309	31919418
38	rs35432	12	115555530	RP11-116D17.1	C/T	1.03107	1.02-1.04	4.125e-09	12	115552878	rs35443	2.459e-06	-2652	Heart failure	115150	36376295
39	rs10846742	12	125308682	SCARB1	A/G	1.05	1.03-1.06	1.73e-09	12	124689415	rs75101008	0.0004805	-619267	Heart failure	90653	37429843
40	rs114352564	13	19193033	TUBA3C	A/G	1.2147	1.14-1.29	1.629e-09	13	19645038	rs572581787	0.008499	452005	Heart failure	115150	36376295
41	rs959388	14	30169987	PRKD1	T/G	1.03	1.02-1.04	1.3e-08	14	30683170	rs71415931	0.006762	513183	Heart failure	90653	37429843
42	rs1712355	14	35347512	BAZ1A	T/G	1.0285	1.02-1.04	3.591e-08	14	35943195	rs79056656	0.0006551	595683	Heart failure	115150	36376295
43	rs10519210	15	63737925	USP3	G/T	1.53	1.05-2.24	1.4e-08	15	62902932	rs7168059	8.465e-05	-834993	Incident Heart Failure	2526	20445134
44	rs56094641	16	53806453	FTO	G/A	1.05	1.03-1.06	1.21e-08	16	53823878	rs28432761	4.168e-06	17425	Heart failure	47309	31919418
45	rs12933292	16	69566309	NFAT5	G/C	1.03	1.02-1.05	8.96e-10	16	69117750	rs143039049	0.006252	-448559	Heart failure	90653	37429843
46	rs12325072	16	73006574	ZFHX3	C/T	1.04175	1.03-1.06	6.697e-10	16	73041519	rs59275616	6.752e-07	34945	Heart failure	115150	36376295
47	rs216193	17	2203453	SRR	A/G	1.03262	1.02-1.04	6.729e-10	17	1995135	rs59253773	3e-05	-208318	Heart failure	115150	36376295
48	rs3764351	17	37824339	PNMT	A/G	1.03	1.02-1.05	2.27e-08	17	37387413	rs883544	5.96e-08	-436926	Heart failure	90653	37429843
49	rs113437066	17	65836220	BPTF	ATTT/A	1.06	1.04-1.08	1.81e-10	17	66775485	rs145135855	0.0005064	939265	Heart failure	90653	37429843
50	rs2306527	17	76798155	USP36	C/T	1.03593	1.02-1.05	1.115e-10	17	76364677	rs4994934	0.0003722	-433478	Heart failure	115150	36376295
51	rs1788826	18	21154024	NPC1	G/A	1.03241	1.02-1.04	1.129e-08	18	21256689	rs117626720	0.0009278	102665	Heart failure	115150	36376295
52	rs34728432	18	31255918	ASXL3	G/A	1.03097	1.02-1.04	2.992e-08	18	32230720	rs1240975	0.00115	974802	Heart failure	115150	36376295
53	rs4327120	18	36532976	CELF4	C/T	1.05	1.03-1.07	3.09e-08	18	36954972	rs546806077	0.001059	421996	Heart failure	90653	37429843
54	rs1539952	18	57766512	PMAIP1	G/A	1.03427	1.02-1.05	1.745e-08	18	57741783	rs1942866	0.0001364	-24729	Heart failure	115150	36376295
55	rs10520390	19	46327831	SYMPK	G/C	1.08	1.05-1.10	2.87e-08	19	47323708	rs2032841	0.001576	995877	Heart failure	90653	37429843
56	rs2832275	21	30602994	BACH1	A/T	1.05	1.03-1.06	2.9e-10	21	31146957	rs459385	0.002631	543963	Heart failure	90653	37429843
57	rs361894	22	22876938	ZNF280A	C/T	1.1474	1.10-1.20	6.059e-09	22	22523351	rs6001170	0.0006507	-353587	Heart failure	115150	36376295

## Sheet: S4
Table S4. 2 loci identified for heart failure in the male-specific meta-analysis of the China PEACE 5p-HF/ChinaHEART and Biobank Japan.
Number in parentheses indaicate number of cases/controls.
CHR, chromosome; BP, base pair position (hg19); EA, effect allele; NEA, non-effect allele; EAF, effect allele frequency; OR, odds ratio; 95L, lower 95% confidence interval; 95U, upper 95% confidence interval.
*EAF is from controls in BBJ.
					Meta-analysis (8,419/107,613)							the China PEACE 5p-HF/ChinaHEART (2,515/4,170)					BBJ (5,904/103,443)
Locus	SNP	CHR	BP	Gene	EA	NEA	OR	95L	95U	P	P_het	EAF	OR	95L	95U	P	EAF*	OR	95L	95U	P	Previously Identified? (Trait)	PMID
1	rs1321311	6p21.2	36622900	CDKN1A	C	A	1.15419	1.09835	1.21287	1.511e-08	0.008832	0.8349	1.29977	1.17393	1.43911	4.50352e-07	0.874063	1.11222	1.05072	1.17732	0.000247553	Heart failure	31919418, 36376295
2	rs139616510	11p11.2	47266755	MYBPC3	T	C	2.04112	1.59228	2.61649	1.775e-08	0.2938	0.005613	2.54234	1.57427	4.10571	0.000135824	0.00494834	1.88321	1.40877	2.51742	1.91783e-05	No

## Sheet: S5
Table S5. Combined and sex-stratified results for 5 loci identified for heart failure in meta-analysis of the China PEACE 5p-HF/ChinaHEART and Biobank Japan.
Number in parentheses indaicate number of cases/controls.
CHR, chromosome; BP, base pair position (hg19); EA, effect allele; NEA, non-effect allele; EAF, effect allele frequency; OR, odds ratio; 95L, lower 95% confidence interval; 95U, upper 95% confidence interval.
							Combined_HF (13,385/214,211)				Males_HF (8,419/107,613)				Females_HF (4,966/106,598)
Locus	SNP	CHR	BP	Gene	EA	NEA	OR	95L	95U	P	OR	95L	95U	P	OR	95L	95U	P	P_het
1	rs17076	2q31.2	179595117	TTN	C	G	1.09046	1.06032	1.12146	1.199e-09	1.09724	1.059	1.13687	2.944e-07	1.08654	1.03804	1.13731	0.0003653	0.7398
2	rs2129981	4q25	111704199	PITX2	T	G	1.09505	1.06645	1.12441	1.515e-11	1.09593	1.0598	1.13328	7.997e-08	1.08904	1.04308	1.13703	0.0001028	0.8211
3	rs9462210	6p21.2	36628953	CDKN1A	G	A	1.12817	1.08502	1.17305	1.388e-09	1.15269	1.09693	1.21129	1.867e-08	1.08611	1.01928	1.15732	0.01069	0.1478
4	rs12542527	8q24.13	125876444	MTSS1	A	G	1.07832	1.05016	1.10723	2.597e-08	1.07444	1.03903	1.11106	2.799e-05	1.07939	1.03343	1.1274	0.0005752	0.8696
5	rs139616510	11p11.2	47266755	MYBPC3	T	C	1.74177	1.43963	2.10731	1.151e-08	2.04112	1.59228	2.61649	1.775e-08	1.3383	0.984391	1.81945	0.06292	0.0362

## Sheet: S6
Table S6. 3 loci identified for non-ischemic cardiomyopathy (NICM) in meta-analysis of the China PEACE 5p-HF/ChinaHEART and the UK Biobank.
Number in parentheses indaicate number of cases/controls.
CHR, chromosome; BP, base pair position (hg19); EA, effect allele; NEA, non-effect allele; EAF, effect allele frequency; OR, odds ratio; 95L, lower 95% confidence interval; 95U, upper 95% confidence interval.
* EAF from 1000G Europeans.
					Meta-analysis (3,603/399,497)							the China PEACE 5p-HF/ChinaHEART (1,787/11,171)					UK Biobank (1,816/388,326)
Locus	SNP	CHR	BP	Gene	EA	NEA	OR	95L	95U	P	P_het	EAF	OR	95L	95U	P	EAF*	OR	95L	95U	P	Previously Identified? (Trait)	PMID
1	rs1906593	4q25	111711922	PITX2	T	C	1.20852	1.13907	1.28222	3.536e-10	0.2148	0.5163	1.17515	1.09149	1.26523	1.84259e-05	0.1561	1.27062	1.15101	1.40265	2.05022e-06	Heart failure	31919418, 36376295
2	rs2182400	10p11.23	29707551	SVIL-AS1	G	A	1.15731	1.0983	1.21949	4.57e-08	0.5324	0.5285	1.13801	1.05648	1.22583	0.000653278	0.2545	1.17662	1.09292	1.26673	1.55968e-05	No
3	rs75959316	13q34	113065400	MCF2L	A	C	1.47595	1.29077	1.6877	1.265e-08	7.613e-39	0.005441	19.4458	12.9028	29.3067	1.21339e-45	0.0219	1.0842	0.940797	1.24947	0.264044	No

## Sheet: S7
Table S7. Association of 5 novel HF loci with HF risk factors in literature.
BMI, body mass index; SBP, systolic blood pressure; DBP, diastolic blood pressure; PP, pulse pressure; LDL, low-density lipoprotein cholesterol; HDL, high-density lipoprotein cholesterol; TC, total cholesterol; TG, triglycerides; eGFR, estimated glomerular filtration rate; AF, atrial fibrillation; CAD, coronary artery disease; MI, myocardial infarction; T2D, type 2 diabetes.
*Results of rs139616510 and rs75959316 were taken from PMID: 34594039 for BMI association.
**Results of rs139616510 were taken from PMID:32514122 for CAD and T2D association.
Effect sizes are based on HF risk allele at each indicated locus and shown as either ORs for binary traits or betas for quantitative traits.
Associaitons with P≤ Bonferroni-corrected threshold for testing 5 SNPs and 13 traits (0.05/65=7.7x10-4) are shown in bold.
	rs17076_C (2q31.2, TTN)				rs12542527_A (8q24.13, MTSS1)				rs2182400_G (10q11.23, SVIL-AS1)				rs139616510_T (11p11.2, MYBPC3)				rs75959316_A (13q34, MCF2L)
Trait	Beta	SE	P	N	Beta	SE	P	N	Beta	SE	P	N	Beta	SE	P	N	Beta	SE	P	N
BMI (PMID:30124842)	0.0041	0.0022	0.07	691310	0.0024	0.0019	0.2	692437	-0.001	0.002	0.61	689165	-0.0481	0.028	0.08531	~628,000*	-0.0095	0.0052	0.07059	~628,000*
Blood pressure (PMID:30224653)
SBP	0.0707	0.0395	0.07313	734666	-0.0557	0.0336	0.09756	730990	0.019	0.0354	0.5907	732435	NA	NA	NA	NA	NA	NA	NA	NA
DBP	0.0358	0.0226	0.1139	754046	-0.0395	0.0193	0.04034	750405	0.0472	0.0203	0.02009	751725	NA	NA	NA	NA	NA	NA	NA	NA
PP	0.0317	0.0268	0.2365	734653	-0.0166	0.0228	0.4655	730990	-0.0216	0.024	0.3687	732416	NA	NA	NA	NA	NA	NA	NA	NA
Lipid (PMID:24097068)
LDL	-0.0038	0.0068	0.6542	89888	0.0017	0.0058	0.6587	89886	-0.0087	0.0062	0.3255	86911	NA	NA	NA	NA	NA	NA	NA	NA
HDL	0.0083	0.0063	0.6128	94311	0.0093	0.0054	0.05557	94309	-0.0029	0.0056	0.9357	91293	NA	NA	NA	NA	NA	NA	NA	NA
TC	0.0001	0.0067	0.9719	94595	-0.002	0.0057	0.8418	94593	-0.0076	0.006	0.4544	91533	NA	NA	NA	NA	NA	NA	NA	NA
TG	0.0013	0.0061	0.7548	91013	-0.0117	0.0052	0.06371	91011	-0.0032	0.0055	0.7878	87951	NA	NA	NA	NA	NA	NA	NA	NA
eGFR (PMID:34272381)	-0.0007	0.0003	0.03936	~1,201,909	0.0006	0.0003	0.02202	~1,201,909	0.0014	0.0003	5.828e-07	~1,201,909	NA	NA	NA	NA	0	0.0007	0.9667	~1,201,909
AF (PMID:29892015)	0.935944	0.0089	9.684e-14	~588,190	0.961558	0.0078	4.698e-07	~588,190	1.00602	0.0082	0.4662	~588,190	NA	NA	NA	NA	0.972972	0.0201	0.1729	~588,190
CAD (PMID:29212778)	0.987874	0.0072	0.09292	~547,261	0.9991	0.0062	0.8801	~547,261	0.998601	0.0064	0.8264	~547,261	0.929176	0.07039	0.296688	212,453**	0.998102	0.0149	0.8957	~547,261
MI (PMID:33532862)	0.994597	0.009404	0.564559	~639,000	0.995364	0.008291	0.575178	~639,000	0.998932	0.00849	0.899785	~639,000	NA	NA	NA	NA	0.955889	0.021154	0.032972	~639,000
T2D (PMID:30054458)	0.994813	0.0102	0.6094	572500	0.988665	0.0086	0.1843	577476	0.997703	0.0092	0.8057	576107	0.910646	0.0636	0.1411	191,764**	NA	NA	NA	NA

## Sheet: S8
Table S8. Association of 5 novel HF loci with cardiac magnetic resonance imaging (MRI)-derived left ventricular measure in the UK Biobank.
Summary level results were taken from PMID: 32382064.
LVEF, Left ventricular ejection fraction; LVEDV, Left ventricular end-diastolic volume; LVESV, Left ventricular end-systolic volume; SV, stroke volume.
Associaitons with P≤ Bonferroni-corrected threshold for testing 5 SNPs and 4 traits (0.05/20=2.5x10-3) are shown in bold.
*Linear regression were conducted for rank-based inverse normal-transformed values of left ventricular measurement with the adjustment for age, gender and PC1-3 in heart failure cases who have left ventricular measurement in the China PEACE 5p-HF study.
	rs17076_C (2q31.2, TTN)				rs12542527_A (8q24.13, MTSS1)				rs2182400_G (10q11.23, SVIL-AS1)				rs139616510_T (11p11.2, MYBPC3)				rs75959316_A (13q34, MCF2L)
Trait	Beta	SE	P	N	Beta	SE	P	N	Beta	SE	P	N	Beta*	SE*	P*	N*	Beta	SE	P	N
LVEF	-0.0767947	0.00893489	8.3e-18	36042	-0.0318841	0.00767387	3.3e-05	36042	-0.0259404	0.00809286	0.0013	36042	-0.382296	0.128798	0.003	3741	-0.0235483	0.0156652	0.13	36042
LVEDV	0.052294	0.00760646	6.2e-12	36042	0.0379414	0.00654061	6.6e-09	36042	0.0125471	0.00689622	0.069	36042	0.469755	0.153822	0.0023	2492	0.0209828	0.0133458	0.12	36042
LVESV	0.0728802	0.00784525	1.5e-20	36042	0.0407378	0.00674274	1.5e-09	36042	0.021822	0.00711033	0.0021	36042	0.43678	0.153531	0.0045	2494	0.0239797	0.0137712	0.082	36042
SV	0.0239873	0.00813635	0.0032	36042	0.0272276	0.00699279	9.9e-05	36042	-0.000666778	0.00737187	0.93	36042	0.344097	0.162489	0.0343	2504	0.014006	0.0142576	0.33	36042

## Sheet: S9
Table S9. Results of Data-driven Expression-Prioritized Integration for Complex Traits (DEPICT) gene set enrichment analysis with SNPs significantly (FDR<0.05) associated with heart failure in GWAS meta-analysis of the China PEACE 5p-HF/ChinaHEART and Biobank Japan.
Original gene set description	Nominal P value	False discovery rate < 5%
abnormal myocardial trabeculae morphology	4.4171e-06	No
embryonic growth retardation	2.05854e-05	No
thin ventricular wall	2.6015e-05	No
NLK subnetwork	3.05429e-05	No
TRIP6 subnetwork	4.25393e-05	No
SUMO2 subnetwork	6.36726e-05	No
actin monomer binding	6.69566e-05	No
abnormal heart development	6.80241e-05	No
ATXN2 subnetwork	7.03983e-05	No
PRKAA1 subnetwork	0.000100893	No
abnormal heart morphology	0.000110714	No
thin myocardium compact layer	0.000117091	No
DVL3 subnetwork	0.000118953	No
abnormal fetal cardiomyocyte morphology	0.000138215	No
PPARG subnetwork	0.000140443	No
EIF3J subnetwork	0.000143152	No
SMYD2 subnetwork	0.000199589	No
transcription regulatory region DNA binding	0.000257455	No
ACTN4 subnetwork	0.000267025	No
dilated heart atrium	0.00027324	No
pericardial effusion	0.000283728	No
TGM2 subnetwork	0.00028534	No
TLN1 subnetwork	0.000315369	No
regulatory region nucleic acid binding	0.000340185	No
regulatory region DNA binding	0.000340185	No
SMURF2 subnetwork	0.000373439	No
REACTOME_GRB2SOS_PROVIDES_LINKAGE_TO_MAPK_SIGNALING_FOR_INTERGRINS	0.000408919	No
abnormal heart atrium morphology	0.000420286	No
TNNT2 subnetwork	0.000478194	No
DEGS1 subnetwork	0.000554382	No
protein binding transcription factor activity	0.000558426	No
hemorrhage	0.000570774	No
SMAD2 subnetwork	0.000571865	No
SRRM2 subnetwork	0.000575366	No
COIL subnetwork	0.000616461	No
transcription coactivator activity	0.000656638	No
regulation of bone mineralization	0.000672292	No
NQO1 subnetwork	0.000679631	No
thick interventricular septum	0.000701544	No
NAF1 subnetwork	0.000728128	No
RPL28 subnetwork	0.000740595	No
abnormal cranial nerve morphology	0.00081082	No
CBX4 subnetwork	0.000862197	No
MYO1C subnetwork	0.000906855	No
congestive heart failure	0.0010216	No
transcription regulatory region sequence-specific DNA binding	0.00102735	No
trabecula carnea hypoplasia	0.0010555	No
SMARCA4 subnetwork	0.00107704	No
abnormal spermatogonia morphology	0.00108703	No
abnormal spine curvature	0.00112656	No
BCLAF1 subnetwork	0.00114111	No
RPS6KB1 subnetwork	0.00114939	No
PPP1R12A subnetwork	0.00125861	No
HDAC3 subnetwork	0.00126144	No
CLPB subnetwork	0.00127048	No
IVL subnetwork	0.00128549	No
decreased cardiac muscle contractility	0.00129154	No
complete embryonic lethality during organogenesis	0.00131919	No
LHX3 subnetwork	0.00133573	No
MYNN subnetwork	0.00135558	No
KCTD20 subnetwork	0.00137662	No
abnormal heart shape	0.00137995	No
MPRIP subnetwork	0.00139372	No
abnormal intercalated disc morphology	0.00141957	No
LMNA subnetwork	0.00144582	No
MYOC subnetwork	0.00145951	No
abnormal blood vessel physiology	0.00150847	No
STRAP subnetwork	0.00151891	No
SUMO4 subnetwork	0.00152313	No
RNF41 subnetwork	0.00159954	No
RNA polymerase II transcription factor binding	0.00164561	No
SP100 subnetwork	0.0016468	No
transcription factor binding transcription factor activity	0.00169654	No
ephrin receptor signaling pathway	0.00179161	No
FLNC subnetwork	0.00189205	No
NR3C2 subnetwork	0.0019644	No
FASN subnetwork	0.00198462	No
TUBB3 subnetwork	0.00199555	No
KIF1B subnetwork	0.00199837	No
SMAD3 subnetwork	0.00206143	No
CTNNA1 subnetwork	0.00213754	No
ACTN1 subnetwork	0.00215461	No
disorganized myocardium	0.00216303	No
transcription cofactor activity	0.00225254	No
EIF1AX subnetwork	0.00231667	No
decreased embryo size	0.00239096	No
CAPN3 subnetwork	0.00248385	No
FAM55B subnetwork	0.00253801	No
BAG4 subnetwork	0.00255462	No
REACTOME_P130CAS_LINKAGE_TO_MAPK_SIGNALING_FOR_INTEGRINS	0.0026041	No
abnormal angiogenesis	0.00261637	No
PKLR subnetwork	0.00264098	No
edema	0.00265378	No
microfilament motor activity	0.00269476	No
MYL6 subnetwork	0.00275888	No
abnormal heart left ventricle morphology	0.00276617	No
heart development	0.00278351	No
erythrocyte homeostasis	0.00285515	No
in utero embryonic development	0.0028944	No
RPS6KA4 subnetwork	0.0029169	No
ELAVL1 subnetwork	0.00295343	No
transcription factor binding	0.0030345	No
increased cochlear outer hair cell number	0.00318059	No
SYNPO subnetwork	0.00318778	No
CYFIP2 subnetwork	0.00321484	No
SCIN subnetwork	0.00323285	No
ligand-dependent nuclear receptor transcription coactivator activity	0.00323933	No
CCDC85B subnetwork	0.00325187	No
partial lethality throughout fetal growth and development	0.00326327	No
HIF1A subnetwork	0.00327311	No
abnormal embryo turning	0.00330952	No
CREBBP subnetwork	0.00332098	No
CCDC165 subnetwork	0.00336394	No
failure of heart looping	0.0033697	No
protein localization to nucleus	0.00344304	No
FZR1 subnetwork	0.00348708	No
EIF5B subnetwork	0.00349796	No
erythrocyte differentiation	0.0035969	No
heart morphogenesis	0.00373386	No
IGSF21 subnetwork	0.00375353	No
SHC4 subnetwork	0.00380991	No
PABPC3 subnetwork	0.00385704	No
HMOX1 subnetwork	0.00387154	No
BNIP3L subnetwork	0.00387324	No
decreased skeletal muscle fiber diameter	0.00391445	No
MYH14 subnetwork	0.00393425	No
ENSG00000112727 subnetwork	0.00398195	No
HIST1H3E subnetwork	0.00398195	No
HIST1H3C subnetwork	0.00398195	No
ENSG00000178458 subnetwork	0.00398195	No
HIST1H3A subnetwork	0.00398195	No
HIST1H3I subnetwork	0.00398195	No
HIST1H3J subnetwork	0.00398195	No
HIST1H3B subnetwork	0.00398195	No
HIST1H3D subnetwork	0.00398195	No
abnormal embryonic tissue morphology	0.00404239	No
RCAN1 subnetwork	0.00407238	No
transcription corepressor activity	0.00407436	No
ENO3 subnetwork	0.00408221	No
REACTOME_CREB_PHOSPHORYLATION_THROUGH_THE_ACTIVATION_OF_RAS	0.00414595	No
DDX3X subnetwork	0.00418841	No
SPDYA subnetwork	0.00423886	No
ABCF2 subnetwork	0.00433209	No
cell-cell adherens junction	0.00437063	No
ARPC2 subnetwork	0.00439357	No
VCL subnetwork	0.00440681	No
CEP170 subnetwork	0.00448869	No
cell-substrate adhesion	0.00455455	No
KEGG_WNT_SIGNALING_PATHWAY	0.00463624	No
RPS21 subnetwork	0.00483534	No
ABLIM3 subnetwork	0.00497643	No
dilated heart left ventricle	0.00499423	No
small mandible	0.0050167	No
RPL32 subnetwork	0.00505143	No
ZFPM1 subnetwork	0.00511909	No
KRT18 subnetwork	0.00512111	No
nuclear import	0.0051438	No
pericardial edema	0.00520858	No
protein import into nucleus	0.00536799	No
RPL22 subnetwork	0.00542044	No
SMAD4 subnetwork	0.00547979	No
CPSF4 subnetwork	0.00551237	No
abnormal blood circulation	0.00559072	No
cardiac ventricle development	0.00559473	No
TUBA1A subnetwork	0.00563396	No
GAPDH subnetwork	0.00564295	No
LGALS4 subnetwork	0.00578198	No
ITGA2 subnetwork	0.00579327	No
heart formation	0.00582919	No
ADP binding	0.0058626	No
cell-matrix adhesion	0.00586469	No
SLC25A13 subnetwork	0.0058946	No
C1QA subnetwork	0.00598044	No
WDR18 subnetwork	0.00599005	No
ATN1 subnetwork	0.00599495	No
vertebral transformation	0.00604768	No
positive regulation of DNA binding	0.00606258	No
GFRA2 subnetwork	0.00606606	No
response to endoplasmic reticulum stress	0.00607648	No
ALB subnetwork	0.00609275	No
TAB1 subnetwork	0.00615796	No
ETV6 subnetwork	0.00615799	No
necrosis	0.00617602	No
partial embryonic lethality during organogenesis	0.00618115	No
abnormal neural fold elevation formation	0.00620827	No
actin binding	0.00622623	No
PABPC1 subnetwork	0.00640326	No
increased left ventricle weight	0.00644853	No
dilated heart right ventricle	0.0065571	No
EPB41 subnetwork	0.00663267	No
HNRNPH1 subnetwork	0.00663728	No
PRKAA2 subnetwork	0.0066455	No
regulation of DNA binding	0.0066902	No
transcriptional repressor complex	0.00672198	No
TNNT1 subnetwork	0.00674295	No
cardioblast differentiation	0.00676233	No
ABI3 subnetwork	0.00680501	No
abnormal sternum ossification	0.006826	No
RASSF1 subnetwork	0.00689475	No
SMAD7 subnetwork	0.00704525	No
anchoring junction	0.00707688	No
RNA polymerase II transcription factor binding transcription factor activity	0.00712775	No
CAPZB subnetwork	0.00712926	No
ENSG00000108504 subnetwork	0.00718504	No
MAFG subnetwork	0.00735559	No
HRNR subnetwork	0.00737465	No
WNT4 subnetwork	0.00744024	No
fetal growth retardation	0.00745411	No
ATF2 subnetwork	0.00747061	No
regulation of embryonic development	0.00750947	No
CASKIN1 subnetwork	0.00751002	No
abnormal placental labyrinth vasculature morphology	0.00751202	No
embryonic growth arrest	0.00761075	No
bone mineralization	0.00764914	No
actin cytoskeleton	0.00766539	No
endochondral bone growth	0.00768435	No
ZMYND11 subnetwork	0.00768985	No
ventricular septal defect	0.00770174	No
SORL1 subnetwork	0.00774878	No
abnormal heart ventricle morphology	0.00778769	No
adherens junction	0.00781025	No
RBPJ subnetwork	0.00785374	No
kyphosis	0.00807434	No
CFL1 subnetwork	0.00808195	No
EIF1AY subnetwork	0.00809503	No
R-SMAD binding	0.00809935	No
MAPKAPK2 subnetwork	0.00812513	No
actomyosin	0.00818147	No
abnormal palatal shelf elevation	0.00826086	No
CDK9 subnetwork	0.00826601	No
CCNE1 subnetwork	0.00835987	No
KLHL13 subnetwork	0.00843797	No
abnormal coronary artery morphology	0.00850832	No
PRKD2 subnetwork	0.00854012	No
EIF2C1 subnetwork	0.00854438	No
WNT5B subnetwork	0.00855988	No
delayed embryo turning	0.00856256	No
AP2S1 subnetwork	0.0085727	No
WNT7A subnetwork	0.00858937	No
FRY subnetwork	0.00865391	No
nBAF complex	0.00866114	No
REACTOME_SIGNALING_BY_NODAL	0.00869735	No
FHL2 subnetwork	0.0087724	No
CSRP3 subnetwork	0.00877599	No
CORO1C subnetwork	0.00882597	No
TTN subnetwork	0.00886721	No
WNT2B subnetwork	0.00890135	No
FBN1 subnetwork	0.00890678	No
SCN5A subnetwork	0.0090959	No
MYH9 subnetwork	0.00916117	No
DLST subnetwork	0.00932413	No
ACTG2 subnetwork	0.00932942	No
PCMT1 subnetwork	0.00944146	No
ADRA1D subnetwork	0.00944789	No
abnormal sensory neuron morphology	0.00947245	No
abnormal sternebra morphology	0.0095163	No
HIST2H3A subnetwork	0.00953112	No
HIST1H3H subnetwork	0.00953314	No
abnormal brain development	0.00963416	No
HSPH1 subnetwork	0.00965436	No
FLI1 subnetwork	0.00965446	No
RNA polymerase II core promoter proximal region sequence-specific DNA binding transcription factor activity	0.00973024	No
abnormal forebrain development	0.00974518	No
DVL1 subnetwork	0.00975167	No
LDB1 subnetwork	0.00979173	No
ATPase activity	0.00984617	No
abnormal blood vessel morphology	0.00986425	No
RAI14 subnetwork	0.00986729	No
abnormal muscle electrophysiology	0.00988877	No
RPS27A subnetwork	0.00991229	No
enlarged liver sinusoidal spaces	0.00992476	No
CTNND1 subnetwork	0.00996966	No
TIAL1 subnetwork	0.010001	No
absent vitelline blood vessels	0.0100576	No
abnormal sarcomere morphology	0.0100625	No
IRF1 subnetwork	0.0100781	No
co-SMAD binding	0.0100964	No
AKT1 subnetwork	0.0102455	No
chromatin binding	0.0102658	No
FBLN1 subnetwork	0.0103657	No
DLL1 subnetwork	0.0104244	No
RNA polymerase II transcription cofactor activity	0.0105131	No
RPS15 subnetwork	0.0105165	No
abnormal head morphology	0.0106038	No
FANCC subnetwork	0.0106196	No
DDX46 subnetwork	0.0106929	No
REACTOME_GTP_HYDROLYSIS_AND_JOINING_OF_THE_60S_RIBOSOMAL_SUBUNIT	0.010728	No
cell-substrate adherens junction	0.0107777	No
cervical vertebral fusion	0.0107898	No
abnormal placenta development	0.0110303	No
RPS4Y1 subnetwork	0.0110725	No
embryonic hemopoiesis	0.0111111	No
ATG12 subnetwork	0.0111983	No
USP7 subnetwork	0.0112068	No
STARD13 subnetwork	0.0113048	No
ENSG00000196084 subnetwork	0.0113886	No
drug binding	0.0114183	No
regulation of biomineral tissue development	0.0114858	No
FDXR subnetwork	0.0115681	No
WNT1 subnetwork	0.0116683	No
C20orf160 subnetwork	0.0116761	No
VPRBP subnetwork	0.0116842	No
TTC1 subnetwork	0.0117927	No
KEGG_HYPERTROPHIC_CARDIOMYOPATHY_HCM	0.0118972	No
WNT3 subnetwork	0.01191	No
NOS2 subnetwork	0.011956	No
GATA2 subnetwork	0.0119662	No
BTBD10 subnetwork	0.0121442	No
disorganized yolk sac vascular plexus	0.0122526	No
CAMK2B subnetwork	0.0122578	No
ZBTB17 subnetwork	0.0123214	No
HOXB7 subnetwork	0.0125314	No
WNT6 subnetwork	0.0125558	No
ENSG00000134025 subnetwork	0.0125921	No
abnormal developmental patterning	0.0126596	No
cardiac fibrosis	0.0126717	No
ventricular hypoplasia	0.0127056	No
abnormal extraembryonic tissue morphology	0.0127597	No
SPECC1 subnetwork	0.0128014	No
complete preweaning lethality	0.0128432	No
ENSG00000198618 subnetwork	0.0128891	No
PPIA subnetwork	0.0128891	No
regulation of anatomical structure morphogenesis	0.0128923	No
cardiac ventricle morphogenesis	0.0129151	No
RPSA subnetwork	0.0131309	No
SRSF10 subnetwork	0.013135	No
cell-substrate junction	0.0131434	No
NF2 subnetwork	0.0131805	No
LUZP1 subnetwork	0.0133035	No
liver hemorrhage	0.0133451	No
microcephaly	0.0133839	No
WNT11 subnetwork	0.0134156	No
WNT2 subnetwork	0.0134156	No
WNT8A subnetwork	0.0134156	No
WNT10B subnetwork	0.0134156	No
WNT8B subnetwork	0.0134156	No
WNT9B subnetwork	0.0134156	No
WNT10A subnetwork	0.0134156	No
WNT9A subnetwork	0.0134156	No
ENSG00000196681 subnetwork	0.0134386	No
ENSG00000176534 subnetwork	0.0134386	No
ENSG00000198637 subnetwork	0.0134386	No
RRAD subnetwork	0.0136606	No
STRADA subnetwork	0.0136629	No
transcription factor complex	0.0136782	No
FMR1 subnetwork	0.0136876	No
abnormal postnatal growth/weight/body size	0.0137007	No
PIP4K2C subnetwork	0.013702	No
ENSG00000130041 subnetwork	0.0138321	No
RPS27 subnetwork	0.0138321	No
ARPC5 subnetwork	0.0138412	No
Wnt receptor signaling pathway	0.0138474	No
partial neonatal lethality	0.0138911	No
SRF subnetwork	0.013926	No
APC subnetwork	0.0140485	No
G3BP1 subnetwork	0.0142319	No
abnormal vascular development	0.0143761	No
ETV7 subnetwork	0.0144275	No
MYOZ2 subnetwork	0.01444	No
abnormal outflow tract development	0.0144594	No
FSCN1 subnetwork	0.0144794	No
receptor activator activity	0.0145414	No
enlarged lateral ventricles	0.0145824	No
PKM2 subnetwork	0.0145876	No
NEXN subnetwork	0.014588	No
abnormal postnatal growth	0.0146371	No
decreased embryo weight	0.014659	No
transforming growth factor beta-activated receptor activity	0.0147227	No
LASP1 subnetwork	0.0147228	No
abnormal cardiovascular system morphology	0.0147289	No
TCEB3C subnetwork	0.0148187	No
TMOD1 subnetwork	0.014845	No
KEGG_TIGHT_JUNCTION	0.0148562	No
abnormal embryonic neuroepithelium morphology	0.0148694	No
STK38L subnetwork	0.0148757	No
abnormal vitelline vascular remodeling	0.0148815	No
RPL15 subnetwork	0.0149184	No
FAU subnetwork	0.0149948	No
ventricular cardiac muscle tissue development	0.0151	No
ABI2 subnetwork	0.0151647	No
megacephaly	0.0151998	No
GBE1 subnetwork	0.0153303	No
MYH6 subnetwork	0.0153924	No
ENSG00000102391 subnetwork	0.0154218	No
abnormal seminal vesicle morphology	0.0154687	No
myosin complex	0.01549	No
TNNC1 subnetwork	0.0155208	No
GP1BA subnetwork	0.0155743	No
abnormal pancreatic acinar cell morphology	0.0156161	No
REACTOME_METABOLISM_OF_MRNA	0.0156204	No
REACTOME_FORMATION_OF_A_POOL_OF_FREE_40S_SUBUNITS	0.0156235	No
KIF26A subnetwork	0.0156307	No
RPL37 subnetwork	0.0157681	No
regulation of transforming growth factor beta receptor signaling pathway	0.0158299	No
KRT1 subnetwork	0.0158323	No
thin myocardium	0.0159155	No
TMPO subnetwork	0.0160965	No
KEGG_ADHERENS_JUNCTION	0.0161336	No
short premaxilla	0.0161513	No
REACTOME_INTEGRIN_ALPHAIIB_BETA3_SIGNALING	0.016204	No
absent myocardial trabeculae	0.016211	No
RPL29 subnetwork	0.0162418	No
TRIP12 subnetwork	0.0162731	No
abnormal first branchial arch morphology	0.0163043	No
increased erythroid progenitor cell number	0.0163666	No
KCNMA1 subnetwork	0.0164361	No
CAMK2G subnetwork	0.0166141	No
LDB2 subnetwork	0.0166874	No
CRYAB subnetwork	0.0168546	No
abnormal occipital bone morphology	0.0169054	No
EEF2 subnetwork	0.0169605	No
regulation of cellular component biogenesis	0.0170433	No
hormone biosynthetic process	0.0171694	No
STAB2 subnetwork	0.0172316	No
NR3C1 subnetwork	0.0173811	No
abnormal dorsal aorta morphology	0.0174104	No
FURIN subnetwork	0.0174348	No
regulation of binding	0.0175011	No
ventricular cardiac muscle tissue morphogenesis	0.0176525	No
TTLL3 subnetwork	0.0176709	No
PHC2 subnetwork	0.0176999	No
DVL2 subnetwork	0.017726	No
WNT7B subnetwork	0.0177333	No
REACTOME_NONSENSE_MEDIATED_DECAY_INDEPENDENT_OF_THE_EXON_JUNCTION_COMPLEX	0.0179081	No
CCNB2 subnetwork	0.0179107	No
abnormal branchial arch artery morphology	0.0179933	No
SHMT2 subnetwork	0.0181494	No
cellular response to nutrient	0.0181721	No
increased compact bone thickness	0.0182081	No
abnormal interventricular septum morphology	0.0182653	No
actin cytoskeleton organization	0.0182824	No
UBC subnetwork	0.0184179	No
ITGA7 subnetwork	0.0187356	No
small liver	0.0187552	No
REACTOME_SEMA4D_IN_SEMAPHORIN_SIGNALING	0.0187641	No
ZNF749 subnetwork	0.0188567	No
decreased placenta weight	0.0190608	No
PAK4 subnetwork	0.019072	No
SWI/SNF complex	0.0192059	No
LRP5 subnetwork	0.0192082	No
abnormal head mesenchyme morphology	0.0192246	No
PARN subnetwork	0.0193283	No
stem cell differentiation	0.0193423	No
SYMPK subnetwork	0.0193584	No
myosin II complex	0.0193849	No
actin filament-based process	0.0194015	No
KEGG_ENDOMETRIAL_CANCER	0.0194319	No
abnormal lateral ventricle morphology	0.019446	No
basolateral plasma membrane	0.0194742	No
NCL subnetwork	0.0194749	No
CRIP2 subnetwork	0.0194857	No
FBP1 subnetwork	0.0195424	No
RPS12 subnetwork	0.0196185	No
cardiac chamber morphogenesis	0.0196399	No
RPS10 subnetwork	0.0196813	No
REACTOME_L13A:MEDIATED_TRANSLATIONAL_SILENCING_OF_CERULOPLASMIN_EXPRESSION	0.020022	No
REACTOME_3_:UTR:MEDIATED_TRANSLATIONAL_REGULATION	0.020022	No
fusion of glossopharyngeal and vagus nerve	0.020045	No
disproportionate dwarf	0.0200689	No
IRS2 subnetwork	0.0201109	No
LDB3 subnetwork	0.0201528	No
MYOD1 subnetwork	0.0201619	No
p53 binding	0.0202741	No
WNT5A subnetwork	0.0202982	No
NR1I2 subnetwork	0.0203901	No
NAA10 subnetwork	0.0204116	No
EIF4E subnetwork	0.0204127	No
KEGG_FOCAL_ADHESION	0.0205039	No
abnormal sternum morphology	0.0205386	No
RPS29 subnetwork	0.0205669	No
PPARA subnetwork	0.0206153	No
motor axon guidance	0.0206464	No
REPS2 subnetwork	0.0206772	No
regulation of ossification	0.0207332	No
negative regulation of cellular component organization	0.0207824	No
KEGG_RIBOSOME	0.0210008	No
WWOX subnetwork	0.0210091	No
UTRN subnetwork	0.0211462	No
FNTA subnetwork	0.0211884	No
NCK2 subnetwork	0.0212751	No
TNNI3 subnetwork	0.0213002	No
PLS3 subnetwork	0.0213686	No
PDK2 subnetwork	0.0213982	No
persistent truncus arteriosis	0.0215146	No
abnormal cardiac epithelial to mesenchymal transition	0.0215912	No
ARID1B subnetwork	0.0215922	No
RPS17 subnetwork	0.0216434	No
RPS17L subnetwork	0.0216434	No
LBR subnetwork	0.0217599	No
PGAM2 subnetwork	0.0218598	No
REACTOME_SEMA4D_INDUCED_CELL_MIGRATION_AND_GROWTH:CONE_COLLAPSE	0.0218717	No
positive regulation of binding	0.0219044	No
EIF2AK1 subnetwork	0.0220375	No
RELB subnetwork	0.0220517	No
transforming growth factor beta receptor signaling pathway	0.0221425	No
COL4A4 subnetwork	0.0221535	No
ACTA2 subnetwork	0.0221689	No
ACTC1 subnetwork	0.0223316	No
SMTN subnetwork	0.0224023	No
ACSL4 subnetwork	0.0225167	No
KIAA0913 subnetwork	0.0226361	No
YWHAQ subnetwork	0.0227756	No
TAOK2 subnetwork	0.0228191	No
protein N-terminus binding	0.022853	No
PRKAG1 subnetwork	0.0232074	No
MYOZ1 subnetwork	0.0232524	No
decreased fetal weight	0.0232786	No
LRP6 subnetwork	0.0234286	No
PHKA2 subnetwork	0.0235015	No
JUN subnetwork	0.0235305	No
FLG2 subnetwork	0.0235645	No
negative regulation of cell development	0.0237651	No
abnormal pancreas morphology	0.0238258	No
RPLP1 subnetwork	0.0238258	No
PRKAB2 subnetwork	0.0238406	No
enlarged heart	0.0238771	No
SOX9 subnetwork	0.0238848	No
abnormal forebrain morphology	0.023907	No
stress fiber	0.0240209	No
abnormal tongue morphology	0.0240631	No
interdigital webbing	0.0241141	No
cardiac chamber development	0.0241533	No
enhancer binding	0.0242098	No
KEGG_ARRHYTHMOGENIC_RIGHT_VENTRICULAR_CARDIOMYOPATHY_ARVC	0.0242884	No
abnormal pancreas development	0.0243259	No
BTG2 subnetwork	0.024457	No
MS4A5 subnetwork	0.0246025	No
abnormal snout morphology	0.0247689	No
Wnt-activated receptor activity	0.024834	No
positive regulation of bone mineralization	0.0248615	No
abnormal endocardium morphology	0.0249121	No
inclusion body	0.0250259	No
YBX1 subnetwork	0.0250907	No
response to vitamin	0.0251381	No
decreased survivor rate	0.0251532	No
canonical Wnt receptor signaling pathway	0.0252415	No
DBN1 subnetwork	0.0253627	No
COL4A2 subnetwork	0.0254079	No
THOC2 subnetwork	0.0255085	No
MITF subnetwork	0.025542	No
focal adhesion	0.0255842	No
regulation of organic acid transport	0.0256053	No
abnormal myocardial fiber morphology	0.0256328	No
binding, bridging	0.0257018	No
KRT10 subnetwork	0.025737	No
DNMBP subnetwork	0.0258786	No
HSPA8 subnetwork	0.0261039	No
MLL2 subnetwork	0.0263278	No
SPECC1L subnetwork	0.0263327	No
actin filament bundle	0.0263561	No
short ribs	0.0264872	No
DHX30 subnetwork	0.0266557	No
abnormal ectoderm development	0.0266703	No
myeloid cell differentiation	0.0267129	No
FAM58A subnetwork	0.0267222	No
PKD2 subnetwork	0.0267466	No
abnormal rib-sternum attachment	0.0267721	No
sarcomere	0.0268663	No
TPM1 subnetwork	0.0268742	No
abnormal myocardium layer morphology	0.0268926	No
MYL2 subnetwork	0.02692	No
EIF5A subnetwork	0.0269768	No
CORO1B subnetwork	0.0270521	No
UBB subnetwork	0.0270588	No
abnormal crista ampullaris morphology	0.0270967	No
partial perinatal lethality	0.0272351	No
abnormal facial nerve morphology	0.0272581	No
LCORL subnetwork	0.0274001	No
enhancer sequence-specific DNA binding	0.0274453	No
cleft secondary palate	0.0274681	No
ENSG00000213555 subnetwork	0.0274897	No
EEF1A1 subnetwork	0.0275367	No
COTL1 subnetwork	0.0276016	No
NOD1 subnetwork	0.0276284	No
abnormal anogenital distance	0.0277475	No
complete lethality throughout fetal growth and development	0.0278114	No
RHOXF2 subnetwork	0.0279718	No
EIF4B subnetwork	0.0279978	No
TFDP1 subnetwork	0.0280066	No
TSC1 subnetwork	0.0280793	No
MCF2L subnetwork	0.0280999	No
myofibril	0.028314	No
skin papilloma	0.0284104	No
COL1A2 subnetwork	0.0284402	No
MEIS2 subnetwork	0.0284599	No
REACTOME_NOTCH:HLH_TRANSCRIPTION_PATHWAY	0.0284821	No
REACTOME_NICD_TRAFFICS_TO_NUCLEUS	0.0284821	No
muscle cell differentiation	0.0285218	No
UBE2E1 subnetwork	0.0285291	No
activin binding	0.0285427	No
RAMP3 subnetwork	0.0285823	No
TBP subnetwork	0.0286412	No
RPS19 subnetwork	0.0286501	No
endocrine system development	0.0286768	No
cardiac hypertrophy	0.0286911	No
response to growth factor stimulus	0.0287415	No
EPB41L1 subnetwork	0.0288226	No
organic cation transmembrane transporter activity	0.0289225	No
S100A4 subnetwork	0.0289612	No
PXMP2 subnetwork	0.0289732	No
PRKCA subnetwork	0.0290185	No
RPS6 subnetwork	0.0290233	No
decreased dopamine level	0.0290531	No
WDR6 subnetwork	0.0290563	No
nucleocytoplasmic transport	0.0290623	No
ACTA1 subnetwork	0.0290877	No
CNBP subnetwork	0.0291731	No
RPL3L subnetwork	0.0291828	No
MINPP1 subnetwork	0.0292017	No
SMYD3 subnetwork	0.029288	No
BAI2 subnetwork	0.0293064	No
cellular response to external stimulus	0.0293096	No
GSTM1 subnetwork	0.0293304	No
striated muscle thin filament	0.0293672	No
DDX31 subnetwork	0.0295644	No
UNC45A subnetwork	0.0295677	No
REACTOME_INTEGRIN_CELL_SURFACE_INTERACTIONS	0.0295865	No
REACTOME_NONSENSE:MEDIATED_DECAY	0.0296441	No
REACTOME_NONSENSE_MEDIATED_DECAY_ENHANCED_BY_THE_EXON_JUNCTION_COMPLEX	0.0296441	No
chromatin DNA binding	0.0296451	No
KAT8 subnetwork	0.0296544	No
PRKAG2 subnetwork	0.0296826	No
REACTOME_METABOLISM_OF_RNA	0.0297714	No
abnormal tarsal bone morphology	0.0297777	No
centrally nucleated skeletal muscle fibers	0.0297884	No
SMAD1 subnetwork	0.0298514	No
LTBP1 subnetwork	0.0298846	No
abnormal facial morphology	0.0298852	No
RPL21 subnetwork	0.0299082	No
ADCY8 subnetwork	0.0299373	No
contractile fiber	0.0300739	No
absent atrioventricular cushions	0.0300747	No
SH3BGRL2 subnetwork	0.0300923	No
EIF4E2 subnetwork	0.0301493	No
contractile fiber part	0.0301806	No
regulation of protein complex assembly	0.0302225	No
INHBE subnetwork	0.0303365	No
HIST2H3C subnetwork	0.0305444	No
HIST2H3D subnetwork	0.0305444	No
DUSP1 subnetwork	0.0306791	No
pancreas development	0.0307057	No
growth plate cartilage development	0.030715	No
abnormal truncus arteriosus septation	0.0307324	No
EP300 subnetwork	0.0307367	No
MTA1 subnetwork	0.0309381	No
muscular ventricular septal defect	0.0310011	No
REACTOME_MUSCLE_CONTRACTION	0.0310031	No
exencephaly	0.0311449	No
NUMBL subnetwork	0.0312372	No
IL1RAPL1 subnetwork	0.0312497	No
decreased ventricle muscle contractility	0.0313293	No
abnormal placenta vasculature	0.0315577	No
EIF3I subnetwork	0.0316084	No
REACTOME_APOPTOTIC_EXECUTION__PHASE	0.0316953	No
cellular component disassembly	0.032095	No
SWI/SNF-type complex	0.032112	No
MBD1 subnetwork	0.0321638	No
FLII subnetwork	0.0321949	No
GOLGA2 subnetwork	0.032196	No
transforming growth factor beta binding	0.0322151	No
negative regulation of multicellular organismal process	0.0322205	No
TAX1BP1 subnetwork	0.0322502	No
abnormal endoderm development	0.0324037	No
basement membrane	0.0324343	No
I band	0.0325543	No
PLEC subnetwork	0.0326989	No
RNF2 subnetwork	0.0327168	No
HIP1 subnetwork	0.0327586	No
MYH10 subnetwork	0.0328032	No
TRIM63 subnetwork	0.0328243	No
negative regulation of protein kinase B signaling cascade	0.0328322	No
thoracic vertebral transformation	0.0329442	No
RPL13A subnetwork	0.032967	No
MVP subnetwork	0.0330837	No
positive regulation of transmembrane receptor protein serine/threonine kinase signaling pathway	0.0331381	No
LMO2 subnetwork	0.0331618	No
ACTG1 subnetwork	0.0332448	No
titin binding	0.0332699	No
signalosome	0.0334463	No
WNT3A subnetwork	0.033677	No
abnormal rostral-caudal axis patterning	0.0337556	No
translation regulator activity	0.0338483	No
protein binding, bridging	0.0339807	No
DNAJA2 subnetwork	0.033989	No
GAS2L2 subnetwork	0.0340124	No
cellular component disassembly at cellular level	0.0340191	No
increased cochlear inner hair cell number	0.0341053	No
ACVR1B subnetwork	0.0341151	No
regulation of transmembrane receptor protein serine/threonine kinase signaling pathway	0.0342784	No
nuclear transport	0.0343608	No
CTBP1 subnetwork	0.0345976	No
cardiac chamber formation	0.034624	No
UBR4 subnetwork	0.0346711	No
SOX10 subnetwork	0.034711	No
tube morphogenesis	0.0347199	No
tau-protein kinase activity	0.0347432	No
incomplete somite formation	0.0348564	No
ENSG00000108819 subnetwork	0.0348723	No
PAK2 subnetwork	0.0348857	No
ETF1 subnetwork	0.0348999	No
BHMT subnetwork	0.0349981	No
DNA binding, bending	0.0350451	No
head shaking	0.0350705	No
SEPT7 subnetwork	0.0351934	No
IGDCC4 subnetwork	0.035213	No
FHIT subnetwork	0.0353128	No
TUBB4B subnetwork	0.0353331	No
CHKB subnetwork	0.0353987	No
HADHA subnetwork	0.0354364	No
cardiac muscle tissue morphogenesis	0.0354826	No
muscle tissue morphogenesis	0.0355356	No
REACTOME_EUKARYOTIC_TRANSLATION_ELONGATION	0.0355453	No
CSNK1A1 subnetwork	0.0355511	No
abnormal placenta labyrinth morphology	0.035593	No
PTGS2 subnetwork	0.0355932	No
STUB1 subnetwork	0.0356747	No
abnormal associative learning	0.0357854	No
PPP1CB subnetwork	0.0359021	No
PDGFB subnetwork	0.0359079	No
abnormal foregut morphology	0.0359701	No
WNT16 subnetwork	0.0360099	No
ENSG00000197303 subnetwork	0.0360148	No
increased response of heart to induced stress	0.03604	No
MARK4 subnetwork	0.0361464	No
SMAD binding	0.0362141	No
HOXA5 subnetwork	0.0363054	No
abnormal midbrain-hindbrain boundary development	0.0364226	No
TP73 subnetwork	0.0364268	No
GSPT2 subnetwork	0.036469	No
PRKCE subnetwork	0.036573	No
abnormal craniofacial development	0.0365836	No
REACTOME_TIE2_SIGNALING	0.0366666	No
CALML3 subnetwork	0.0366724	No
decreased tongue size	0.0366849	No
HDAC8 subnetwork	0.0367282	No
positive regulation of ossification	0.0367769	No
enlarged myocardial fiber	0.0368422	No
RPS16 subnetwork	0.0368863	No
epithelial tube morphogenesis	0.0368868	No
positive regulation of intracellular transport	0.0369307	No
cyanosis	0.0369384	No
ATPase activity, coupled to transmembrane movement of ions, phosphorylative mechanism	0.0371392	No
REACTOME_PEPTIDE_CHAIN_ELONGATION	0.0372511	No
increased angiogenesis	0.0374639	No
KPNB1 subnetwork	0.0374949	No
ESR1 subnetwork	0.037513	No
abnormal bone trabecula morphology	0.0375146	No
STAT3 subnetwork	0.0375333	No
increased brown adipose tissue amount	0.0376755	No
abnormal myocardial fiber physiology	0.0377768	No
muscle myosin complex	0.0377922	No
muscle structure development	0.0378623	No
regulation of intracellular transport	0.037912	No
cell junction assembly	0.0380485	No
abnormal skeletal muscle fiber morphology	0.0380635	No
CIR1 subnetwork	0.038078	No
positive regulation of intracellular protein transport	0.0380986	No
regulation of translation	0.0381255	No
ARPC1B subnetwork	0.0381928	No
hemopoietic or lymphoid organ development	0.0382111	No
REACTOME_CAP:DEPENDENT_TRANSLATION_INITIATION	0.0382342	No
REACTOME_EUKARYOTIC_TRANSLATION_INITIATION	0.0382342	No
embryonic hindlimb morphogenesis	0.0382383	No
transmembrane receptor protein kinase activity	0.0383093	No
palate development	0.0383182	No
LIMA1 subnetwork	0.0383356	No
HNRNPK subnetwork	0.038358	No
abnormal Z lines	0.0383871	No
RPL35A subnetwork	0.0384301	No
Z disc	0.0384334	No
establishment of cell polarity	0.0387552	No
thick ventricular wall	0.0388193	No
KLHDC2 subnetwork	0.0388504	No
regulation of hormone metabolic process	0.0388646	No
ENSG00000214869 subnetwork	0.0389551	No
EIF1B subnetwork	0.0389608	No
RPS3 subnetwork	0.0389829	No
ACOT13 subnetwork	0.0390118	No
increased cardiomyocyte apoptosis	0.0391122	No
decreased skeletal muscle fiber number	0.0393295	No
UBXN7 subnetwork	0.0393559	No
enlarged heart atrium	0.0395183	No
abnormal osteocyte morphology	0.0395835	No
EIF4A2 subnetwork	0.0397436	No
VDR subnetwork	0.0398682	No
PML subnetwork	0.0399215	No
decreased circulating free fatty acid level	0.0399753	No
AKR1B1 subnetwork	0.0399873	No
QRFPR subnetwork	0.0400361	No
striated muscle tissue development	0.0401477	No
RNA polymerase II distal enhancer sequence-specific DNA binding transcription factor activity	0.040186	No
EBF3 subnetwork	0.0402582	No
EIF4EBP1 subnetwork	0.0403001	No
CSRP1 subnetwork	0.0403198	No
ITGA2B subnetwork	0.0403433	No
NDN subnetwork	0.0405099	No
VASP subnetwork	0.040536	No
LSM10 subnetwork	0.0406552	No
SYVN1 subnetwork	0.0407624	No
ITGB4 subnetwork	0.0409134	No
SELE subnetwork	0.0409301	No
MOS subnetwork	0.0411133	No
negative regulation of growth	0.0411363	No
Wnt-protein binding	0.0411905	No
RPL34 subnetwork	0.0412077	No
PBRM1 subnetwork	0.0412665	No
RPL7 subnetwork	0.0415638	No
absent inner cell mass	0.041571	No
TBL2 subnetwork	0.0416087	No
FLNA subnetwork	0.0416481	No
thick epidermis	0.0419935	No
epithelial cell differentiation	0.0419992	No
endothelial cell migration	0.0420911	No
respiratory distress	0.0421043	No
impaired wound healing	0.0421298	No
cellular response to vitamin	0.0423949	No
structural constituent of muscle	0.0424648	No
TCAP subnetwork	0.042483	No
CBR1 subnetwork	0.0425275	No
PDPK1 subnetwork	0.0425434	No
eyelids open at birth	0.0426313	No
repressing transcription factor binding	0.0426588	No
abnormal visceral yolk sac morphology	0.0428565	No
CRK subnetwork	0.0429364	No
abnormal placenta morphology	0.0429392	No
UBAP2L subnetwork	0.0430115	No
DECR1 subnetwork	0.0430171	No
RPL7A subnetwork	0.0430404	No
cardiac cell differentiation	0.0431756	No
increased variability of skeletal muscle fiber size	0.0432174	No
YWHAE subnetwork	0.0433196	No
positive regulation of epithelial cell proliferation	0.0433455	No
transmembrane receptor protein serine/threonine kinase activity	0.0434171	No
internal hemorrhage	0.043452	No
VIM subnetwork	0.0434748	No
regulation of nucleocytoplasmic transport	0.0435864	No
abnormal estrous cycle	0.0437457	No
SYAP1 subnetwork	0.0437842	No
REACTOME_VIRAL_MRNA_TRANSLATION	0.0438312	No
PIK3C2A subnetwork	0.0438776	No
tissue morphogenesis	0.0438901	No
DACH1 subnetwork	0.0440257	No
partial lethality	0.0440459	No
small telencephalic vesicles	0.0440762	No
abnormal myocardium compact layer morphology	0.0441913	No
UBE4B subnetwork	0.0442221	No
KSR1 subnetwork	0.044284	No
ENSG00000215699 subnetwork	0.0444018	No
response to vitamin A	0.0444369	No
ATP8A1 subnetwork	0.0444564	No
REACTOME_CELL_SURFACE_INTERACTIONS_AT_THE_VASCULAR_WALL	0.0444995	No
myoblast differentiation	0.044501	No
ENSG00000146677 subnetwork	0.0445032	No
regulation of ATPase activity	0.0445323	No
DES subnetwork	0.0447091	No
NOV subnetwork	0.0447677	No
HAND2 subnetwork	0.0448157	No
CDX2 subnetwork	0.0448756	No
absent stapes	0.0448818	No
CPA1 subnetwork	0.0449253	No
abnormal large intestine crypts of Lieberkuhn morphology	0.0449973	No
TMED2 subnetwork	0.0452845	No
ENSG00000139239 subnetwork	0.0454435	No
abnormal vasculogenesis	0.0454527	No
small basisphenoid bone	0.0455135	No
response to retinoic acid	0.0456174	No
REACTOME_STRIATED_MUSCLE_CONTRACTION	0.0456394	No
PFN4 subnetwork	0.0456486	No
SEL1L subnetwork	0.045673	No
RPS4X subnetwork	0.0456866	No
MYO1B subnetwork	0.0457043	No
reddish skin	0.0457071	No
MYL1 subnetwork	0.045771	No
adult heart development	0.0457947	No
LBP subnetwork	0.0459351	No
REACTOME_PLATELET_AGGREGATION_PLUG_FORMATION	0.0461329	No
PRPF19 subnetwork	0.0463918	No
positive regulation of BMP signaling pathway	0.0463972	No
PRDM15 subnetwork	0.0464092	No
CREM subnetwork	0.0464272	No
decreased oxygen consumption	0.046457	No
SPRY2 subnetwork	0.046485	No
ITGA5 subnetwork	0.0464985	No
MED8 subnetwork	0.0465364	No
abnormal iridocorneal angle	0.0466557	No
REACTOME_REGULATION_OF_MRNA_STABILITY_BY_PROTEINS_THAT_BIND_AU:RICH_ELEMENTS	0.0466965	No
MAGI2 subnetwork	0.0467033	No
RPS11 subnetwork	0.0467037	No
abnormal semicircular canal morphology	0.0467159	No
KEGG_DILATED_CARDIOMYOPATHY	0.0468093	No
motor activity	0.0468194	No
transaminase activity	0.0468446	No
NFKBIA subnetwork	0.0470555	No
ENSG00000185214 subnetwork	0.0471678	No
CKM subnetwork	0.0473386	No
DYRK1A subnetwork	0.0473519	No
MAPK7 subnetwork	0.0473928	No
prolonged PR interval	0.0474174	No
MED17 subnetwork	0.0474824	No
RPS26 subnetwork	0.0475415	No
ENSG00000196656 subnetwork	0.0475415	No
AMN1 subnetwork	0.0475515	No
CDC25B subnetwork	0.0476399	No
PRPF40A subnetwork	0.0478752	No
cell junction organization	0.0479217	No
short snout	0.0479302	No
DDX47 subnetwork	0.0479847	No
absent gastric milk in neonates	0.0480061	No
SSBP1 subnetwork	0.0480148	No
actin filament	0.0480408	No
heart hypoplasia	0.0480461	No
CCND2 subnetwork	0.0480707	No
HIST1H1D subnetwork	0.0480851	No
EDC3 subnetwork	0.0481488	No
EIF5 subnetwork	0.0482123	No
abnormal vascular smooth muscle morphology	0.0482204	No
UACA subnetwork	0.0483424	No
dilated cardiomyopathy	0.0484116	No
PLXNB1 subnetwork	0.0484361	No
ENSG00000032514 subnetwork	0.0484878	No
SCFD1 subnetwork	0.0485728	No
abnormal locomotor activation	0.0485832	No
labyrinthine layer blood vessel development	0.0485999	No
ZBTB33 subnetwork	0.0486198	No
SF1 subnetwork	0.0486385	No
regulation of canonical Wnt receptor signaling pathway	0.0487835	No
HOXA3 subnetwork	0.0489125	No
VEGFB subnetwork	0.048939	No
PDGFD subnetwork	0.0489609	No
PDGFC subnetwork	0.0489609	No
abnormal telencephalon morphology	0.0490141	No
absent incisors	0.0490517	No
NLRC4 subnetwork	0.049098	No
complete perinatal lethality	0.0491169	No
RPS20 subnetwork	0.0491177	No
RAB25 subnetwork	0.0491351	No
prolonged QRS complex duration	0.0491364	No
CKAP4 subnetwork	0.0493182	No
stem cell development	0.0493353	No
TTBK2 subnetwork	0.0494627	No
LAMA1 subnetwork	0.0495191	No
YES1 subnetwork	0.0495221	No
SMARCD3 subnetwork	0.0495413	No
vesicle lumen	0.0495977	No
BAG1 subnetwork	0.0496369	No
increased eating behavior	0.0497864	No
CFL2 subnetwork	0.04979	No
COL4A1 subnetwork	0.0498153	No
abnormal renal/urinary system morphology	0.0498954	No
abnormal tibia morphology	0.0499644	No
KRT8 subnetwork	0.0500063	No
GPR113 subnetwork	0.0500847	No
ENSG00000186852 subnetwork	0.0501296	No
KLF12 subnetwork	0.0501382	No
abnormal vitelline vasculature morphology	0.0501682	No
REACTOME_TRANSCRIPTIONAL_REGULATION_OF_WHITE_ADIPOCYTE_DIFFERENTIATION	0.0501821	No
transmembrane receptor protein serine/threonine kinase signaling pathway	0.0502242	No
SGK223 subnetwork	0.0502634	No
SOD1 subnetwork	0.0503696	No
stem cell maintenance	0.0503997	No
PML body	0.0504409	No
abnormal myogenesis	0.0506322	No
abnormal epicardium morphology	0.0506347	No
circulatory system process	0.0507873	No
MYO3B subnetwork	0.0508464	No
abnormal bone ossification	0.0509998	No
increased rib number	0.0510103	No
decreased osteoblast cell number	0.0510404	No
KEGG_PANTOTHENATE_AND_COA_BIOSYNTHESIS	0.0510477	No
GMNN subnetwork	0.0513281	No
PCDH12 subnetwork	0.0514432	No
RAPSN subnetwork	0.0515131	No
regulation of fatty acid transport	0.0515379	No
KIF3B subnetwork	0.0517122	No
epithelium development	0.0517249	No
KEGG_GNRH_SIGNALING_PATHWAY	0.0518205	No
abnormal incisor morphology	0.0518987	No
CNGA3 subnetwork	0.0520966	No
NPM1 subnetwork	0.0521001	No
abnormal muscle development	0.0522616	No
SLC5A12 subnetwork	0.0523062	No
sequence-specific DNA binding RNA polymerase II transcription factor activity	0.0525018	No
GIPC1 subnetwork	0.0525366	No
response to unfolded protein	0.0525586	No
coagulation	0.0526005	No
abnormal cardiovascular system physiology	0.0527188	No
decreased skeletal muscle mass	0.0528259	No
WDR77 subnetwork	0.0528342	No
RPL9 subnetwork	0.0528552	No
ENSG00000182754 subnetwork	0.0528552	No
OPRM1 subnetwork	0.0529347	No
chordate embryonic development	0.052974	No
SMARCD1 subnetwork	0.053064	No
REACTOME_EUKARYOTIC_TRANSLATION_TERMINATION	0.0531771	No
DERL2 subnetwork	0.0532162	No
TPM2 subnetwork	0.0532434	No
RALGPS2 subnetwork	0.0533554	No
micrognathia	0.0534177	No
ESRRA subnetwork	0.0534609	No
HEATR8 subnetwork	0.0535639	No
abnormal vascular endothelial cell morphology	0.0535889	No
regulation of intracellular protein transport	0.0536041	No
SNAP29 subnetwork	0.0536247	No
chondrodystrophy	0.0536915	No
neuroblast proliferation	0.0537031	No
PAN3 subnetwork	0.053789	No
NKX2-5 subnetwork	0.0537981	No
VAMP8 subnetwork	0.0538979	No
PAK1 subnetwork	0.0539779	No
hormone metabolic process	0.0539795	No
PPARD subnetwork	0.0541149	No
REACTOME_TRANSLATION_INITIATION_COMPLEX_FORMATION	0.0541334	No
HEY1 subnetwork	0.0541924	No
delayed bone ossification	0.0543731	No
regulation of sequence-specific DNA binding transcription factor activity	0.054386	No
EPS8L1 subnetwork	0.0544242	No
CDH5 subnetwork	0.0544279	No
OBSL1 subnetwork	0.0545794	No
ENSG00000091073 subnetwork	0.0546059	No
PINK1 subnetwork	0.0546328	No
SACS subnetwork	0.0546438	No
XIAP subnetwork	0.0546596	No
hemostasis	0.0548347	No
NOLC1 subnetwork	0.0548573	No
abnormal intercostal muscle morphology	0.0548772	No
OR10H2 subnetwork	0.0548954	No
RING1 subnetwork	0.0550862	No
ENSG00000206215 subnetwork	0.0550862	No
RING1 subnetwork	0.0550862	No
blood circulation	0.0551483	No
blood vessel morphogenesis	0.0551698	No
anencephaly	0.0551747	No
cytosolic ribosome	0.055189	No
RASGRP3 subnetwork	0.0553105	No
muscle organ morphogenesis	0.0554091	No
respiratory failure	0.0554475	No
COMP subnetwork	0.0554751	No
decreased hair follicle number	0.0555502	No
EIF3G subnetwork	0.0555643	No
abnormal long bone epiphysis morphology	0.0555741	No
blood vessel development	0.05562	No
decreased chondrocyte cell number	0.0556825	No
regulation of protein import into nucleus	0.0557097	No
KRT6B subnetwork	0.0557209	No
small vertebrae	0.0557236	No
EPCAM subnetwork	0.0557261	No
scoliosis	0.0557948	No
ARHGAP5 subnetwork	0.0558774	No
DDX5 subnetwork	0.0559058	No
ACAD8 subnetwork	0.0559229	No
regulation of organelle organization	0.0561892	No
HNRNPF subnetwork	0.0562648	No
short femur	0.0562861	No
HOXC6 subnetwork	0.0562866	No
POU1F1 subnetwork	0.0563133	No
sprouting angiogenesis	0.0563211	No
MOB1B subnetwork	0.0563367	No
regulation of cell-substrate adhesion	0.0564105	No
FOXA2 subnetwork	0.0564538	No
LEPREL4 subnetwork	0.0565135	No
soluble fraction	0.0565844	No
RPS23 subnetwork	0.0566489	No
regulation of epithelial cell proliferation	0.0566491	No
myosin filament	0.0567402	No
positive regulation of hormone metabolic process	0.0568594	No
RAD54L subnetwork	0.0568982	No
pale yolk sac	0.0569694	No
cleft palate	0.0569962	No
embryo development ending in birth or egg hatching	0.0570199	No
APOB subnetwork	0.0570327	No
abnormal spongiotrophoblast layer morphology	0.0571158	No
CIB1 subnetwork	0.0571233	No
blood coagulation	0.0571457	No
PKP2 subnetwork	0.0572486	No
FIGF subnetwork	0.0572967	No
RNA polymerase II transcription factor binding transcription factor activity involved in negative regulation of transcription	0.0572998	No
RNA polymerase II transcription corepressor activity	0.0572998	No
MYBBP1A subnetwork	0.0574867	No
REACTOME_SIGNALING_BY_TGF_BETA	0.0575262	No
EIF2S1 subnetwork	0.0576542	No
abnormal trophoblast layer morphology	0.0577004	No
FIP1L1 subnetwork	0.0578357	No
AMHR2 subnetwork	0.058159	No
negative regulation of protein complex assembly	0.0581969	No
abnormal hindlimb morphology	0.0582133	No
A band	0.0582434	No
increased circulating creatine kinase level	0.0582788	No
abnormal abdominal fat pad morphology	0.0583816	No
abnormal endolymphatic duct morphology	0.05842	No
ENSG00000206313 subnetwork	0.0584245	No
BAG6 subnetwork	0.0584245	No
BAG6 subnetwork	0.0584245	No
caveola	0.0584411	No
NRG1 subnetwork	0.0584568	No
REACTOME_METABOLISM_OF_AMINO_ACIDS_AND_DERIVATIVES	0.0585545	No
regulation of stress-activated MAPK cascade	0.0585689	No
increased heart weight	0.0587137	No
RPL26L1 subnetwork	0.0587316	No
FHOD1 subnetwork	0.0588165	No
MYLK2 subnetwork	0.0588947	No
tropomyosin binding	0.0589634	No
IRS1 subnetwork	0.0590368	No
RCHY1 subnetwork	0.0590988	No
somatic stem cell maintenance	0.0591572	No
CPOX subnetwork	0.0592007	No
polydactyly	0.0593429	No
abnormal cranium morphology	0.0593729	No
FN1 subnetwork	0.0593809	No
ligand-regulated transcription factor activity	0.0594123	No
muscle tissue development	0.0594151	No
SP1 subnetwork	0.0594521	No
HTRA1 subnetwork	0.0594611	No
ATPase activity, coupled	0.0594778	No
cataracts	0.0595658	No
abnormal glossopharyngeal nerve morphology	0.0596736	No
abnormal bronchus morphology	0.0597545	No
NUMA1 subnetwork	0.0597611	No
TNFRSF1B subnetwork	0.0598459	No
HSPA5 subnetwork	0.0598494	No
abnormal coronary vessel morphology	0.0598678	No
FAF2 subnetwork	0.0599784	No
platelet alpha granule lumen	0.0601278	No
domed cranium	0.0601516	No
cardiac muscle tissue development	0.0601762	No
MARK2 subnetwork	0.060198	No
small interparietal bone	0.0603157	No
decreased heart rate	0.060365	No
D2HGDH subnetwork	0.0604772	No
ENSG00000215692 subnetwork	0.0604772	No
abnormal craniofacial bone morphology	0.060519	No
fascia adherens	0.0605721	No
PHC1 subnetwork	0.0605944	No
ENSG00000206266 subnetwork	0.0605991	No
DOM3Z subnetwork	0.0605991	No
DOM3Z subnetwork	0.0605991	No
NR4A1 subnetwork	0.0607032	No
YWHAH subnetwork	0.0607093	No
abnormal skeleton development	0.0607155	No
npBAF complex	0.0607322	No
CDK10 subnetwork	0.0607941	No
abnormal cardiac muscle contractility	0.0608315	No
absent visceral yolk sac blood islands	0.0608817	No
short tibia	0.0609147	No
abnormal middle ear ossicle morphology	0.0610297	No
abnormal serotonin level	0.0610608	No
MYO6 subnetwork	0.0610969	No
NPHP1 subnetwork	0.0611123	No
decreased tympanic ring size	0.061137	No
HSPBP1 subnetwork	0.0612915	No
CALB2 subnetwork	0.0613706	No
UPF1 subnetwork	0.0613858	No
EIF4A1 subnetwork	0.0613902	No
ENSG00000138396 subnetwork	0.061408	No
hindlimb morphogenesis	0.0614776	No
KLF1 subnetwork	0.061495	No
abnormal heart septum morphology	0.0615877	No
SFRP2 subnetwork	0.0616298	No
abnormal amnion morphology	0.0616418	No
HPX subnetwork	0.0617164	No
positive regulation of nucleocytoplasmic transport	0.0617349	No
abnormal paraxial mesoderm morphology	0.0617946	No
abnormal patella morphology	0.0621337	No
PNMA1 subnetwork	0.0621779	No
TOB1 subnetwork	0.0621943	No
ENSG00000205813 subnetwork	0.0622523	No
PF4V1 subnetwork	0.0622523	No
collagen binding	0.0623387	No
HNRNPR subnetwork	0.0623498	No
MAML1 subnetwork	0.0624007	No
KBTBD7 subnetwork	0.0624286	No
PKD1 subnetwork	0.0624304	No
bone development	0.0625464	No
irregular heartbeat	0.0625503	No
REACTOME_ORGANIC_CATIONANIONZWITTERION_TRANSPORT	0.0626507	No
HGF subnetwork	0.0626641	No
complete prenatal lethality	0.0627721	No
negative regulation of transcription from RNA polymerase II promoter	0.0628377	No
PHKA1 subnetwork	0.0630337	No
abnormal vestibule morphology	0.0630366	No
KEGG_CARDIAC_MUSCLE_CONTRACTION	0.0630568	No
PIP4K2B subnetwork	0.0630609	No
PHC3 subnetwork	0.0630777	No
USP8 subnetwork	0.0631108	No
NAA16 subnetwork	0.0632436	No
foregut morphogenesis	0.063267	No
CUL3 subnetwork	0.06337	No
MAPK14 subnetwork	0.063382	No
vitamin D receptor binding	0.0633861	No
endochondral bone morphogenesis	0.0634197	No
short nasal bone	0.0635667	No
ITIH1 subnetwork	0.0637452	No
IL36RN subnetwork	0.0638119	No
RPS7 subnetwork	0.063898	No
RPL6 subnetwork	0.0641254	No
negative regulation of ossification	0.064175	No
RABGEF1 subnetwork	0.0642922	No
PRDX1 subnetwork	0.0643454	No
decreased birth weight	0.0643761	No
RPS25 subnetwork	0.0643935	No
lung hemorrhage	0.0644651	No
RIPK2 subnetwork	0.0645403	No
renal hypoplasia	0.0645421	No
abnormal autopod morphology	0.0646474	No
AMPD3 subnetwork	0.0646694	No
PPFIA1 subnetwork	0.0647066	No
RICTOR subnetwork	0.0647249	No
EIF4G1 subnetwork	0.0647471	No
PPP1CA subnetwork	0.0647534	No
DLG5 subnetwork	0.0648025	No
ASH2L subnetwork	0.0648826	No
CNN1 subnetwork	0.0650059	No
tube development	0.0650068	No
ADAM12 subnetwork	0.0650258	No
decreased dopaminergic neuron number	0.0650734	No
cellular response to growth factor stimulus	0.0651615	No
bradykinesia	0.0652389	No
altered response of heart to induced stress	0.0652397	No
cellular response to vitamin D	0.0653147	No
abnormal tendon morphology	0.0653567	No
SMARCA5 subnetwork	0.0653931	No
REACTOME_RIBOSOMAL_SCANNING_AND_START_CODON_RECOGNITION	0.0653949	No
PPP1R3D subnetwork	0.0653978	No
NCOR1 subnetwork	0.0653988	No
anterior/posterior pattern specification	0.0654362	No
positive regulation of erythrocyte differentiation	0.0654372	No
ENSG00000128692 subnetwork	0.0655107	No
small thoracic cage	0.0655671	No
cytoplasmic membrane-bounded vesicle lumen	0.0656702	No
CHCHD3 subnetwork	0.0656847	No
skeletal muscle contraction	0.0658127	No
PPP1R3C subnetwork	0.0658141	No
VCAN subnetwork	0.065821	No
abnormal artery morphology	0.065912	No
GADD45GIP1 subnetwork	0.0660191	No
complete embryonic lethality	0.0661742	No
PRSS1 subnetwork	0.0662048	No
REACTOME_DEADENYLATION:DEPENDENT_MRNA_DECAY	0.0662784	No
PSMB3 subnetwork	0.0663544	No
REACTOME_DEADENYLATION_OF_MRNA	0.066478	No
abnormal craniofacial morphology	0.0665395	No
pulmonary edema	0.0665876	No
REACTOME_TRANSPORT_OF_GLUCOSE_AND_OTHER_SUGARS_BILE_SALTS_AND_ORGANIC_ACIDS_METAL_IONS_AND_AMINE_COMPOUNDS	0.0666138	No
ENSG00000099964 subnetwork	0.0666571	No
positive regulation of stress-activated MAPK cascade	0.0666893	No
BRWD1 subnetwork	0.066773	No
regulation of angiogenesis	0.0668361	No
skeletal muscle fiber atrophy	0.0668813	No
absent semicircular canals	0.0668816	No
EIF3D subnetwork	0.0669979	No
EZR subnetwork	0.0670979	No
ZNF326 subnetwork	0.0671162	No
abnormal cochlear inner hair cell morphology	0.0671174	No
increased prostaglandin level	0.0671694	No
WDR1 subnetwork	0.0671813	No
SERPINB8 subnetwork	0.0672757	No
secretory granule lumen	0.0673076	No
enhanced behavioral response to cocaine	0.0674242	No
SLC27A2 subnetwork	0.0674324	No
angiogenesis	0.0674561	No
small placenta	0.0674777	No
vasculature development	0.0675671	No
lens morphogenesis in camera-type eye	0.067602	No
positive regulation of ATPase activity	0.0676063	No
C4A subnetwork	0.0676258	No
TWIST1 subnetwork	0.0676909	No
ETS2 subnetwork	0.0677003	No
LRPAP1 subnetwork	0.0677869	No
HSPA1A subnetwork	0.0678958	No
CAPN1 subnetwork	0.0679166	No
NOS3 subnetwork	0.0680334	No
JUP subnetwork	0.0682034	No
postnatal growth retardation	0.0682355	No
absent lateral semicircular canal	0.068307	No
abnormal diencephalon morphology	0.0683107	No
abnormal brain vasculature morphology	0.0683678	No
GAK subnetwork	0.0683744	No
ATP5A1 subnetwork	0.0684201	No
REACTOME_GLUCOSE_METABOLISM	0.0685605	No
abnormal midbrain development	0.0685881	No
DTX1 subnetwork	0.0686306	No
HEY2 subnetwork	0.0686446	No
abnormal pericardium morphology	0.0688194	No
small first branchial arch	0.0688355	No
abnormal ion homeostasis	0.0690295	No
REACTOME_ANDROGEN_BIOSYNTHESIS	0.0690551	No
abnormal pelvic girdle bone morphology	0.0690983	No
KIAA1267 subnetwork	0.0691131	No
PPP4C subnetwork	0.0691914	No
LHCGR subnetwork	0.0692111	No
abnormal otic vesicle development	0.0693612	No
absent maxillary shelf	0.0694412	No
histone deacetylase complex	0.0694415	No
regulation of organ morphogenesis	0.0694436	No
DSP subnetwork	0.0694894	No
EEF1B2 subnetwork	0.0695104	No
ST13 subnetwork	0.0696759	No
HOXC8 subnetwork	0.0697095	No
complete neonatal lethality	0.069748	No
abnormal osteoblast differentiation	0.0698157	No
CGN subnetwork	0.0699179	No
anterior/posterior axis specification	0.0699376	No
muscle system process	0.0701461	No
PSEN1 subnetwork	0.0702339	No
abnormal cardiac muscle relaxation	0.07032	No
ATP2A3 subnetwork	0.0705527	No
abnormal eye distance/ position	0.0705621	No
ENSG00000136149 subnetwork	0.0708069	No
negative regulation of canonical Wnt receptor signaling pathway	0.07082	No
PRKD1 subnetwork	0.0708304	No
vagina atresia	0.0708354	No
USP18 subnetwork	0.0708401	No
CD82 subnetwork	0.0708523	No
positive regulation of striated muscle tissue development	0.0708586	No
positive regulation of muscle organ development	0.0708586	No
cytosolic large ribosomal subunit	0.070971	No
GPS2 subnetwork	0.0709882	No
gene silencing by miRNA	0.0709917	No
MYCBP2 subnetwork	0.0710158	No
abnormal rib development	0.0710787	No
PJA2 subnetwork	0.0711576	No
NID1 subnetwork	0.0711649	No
XPO6 subnetwork	0.0712633	No
MED1 subnetwork	0.0717035	No
incomplete cephalic closure	0.0717398	No
regulation of protein kinase B signaling cascade	0.0718065	No
viral infectious cycle	0.0718479	No
decreased blood urea nitrogen level	0.0718577	No
PBX2 subnetwork	0.0719086	No
PBX2 subnetwork	0.0719086	No
ENSG00000206247 subnetwork	0.0719086	No
SDHB subnetwork	0.0719171	No
abnormal jaw morphology	0.072046	No
SH2D3A subnetwork	0.0720795	No
TGFB1I1 subnetwork	0.0722243	No
RABEP1 subnetwork	0.0723532	No
morphogenesis of a branching structure	0.0724758	No
APAF1 subnetwork	0.0725379	No
IPO8 subnetwork	0.0726367	No
MARK1 subnetwork	0.0726476	No
early cellular replicative senescence	0.0726848	No
WEE1 subnetwork	0.0727204	No
NFE2 subnetwork	0.0727884	No
absent kidney	0.0727905	No
abnormal skeletal muscle fiber type ratio	0.0728368	No
abnormal heart looping	0.0729892	No
negative regulation of cell proliferation	0.0729961	No
cervical vertebral transformation	0.0732063	No
cardiac ventricle formation	0.0732661	No
SEC16A subnetwork	0.0733321	No
REACTOME_ACTIVATION_OF_THE_MRNA_UPON_BINDING_OF_THE_CAP:BINDING_COMPLEX_AND_EIFS_AND_SUBSEQUENT_BINDING_TO_43S	0.0733959	No
abnormal supraoccipital bone morphology	0.0735636	No
increased interleukin-1 beta secretion	0.0735696	No
DDX39B subnetwork	0.0736133	No
ENSG00000215412 subnetwork	0.0736133	No
DDX39B subnetwork	0.0736133	No
ACADVL subnetwork	0.0736843	No
MYLK3 subnetwork	0.0738019	No
EYA1 subnetwork	0.0738603	No
CARD6 subnetwork	0.0738978	No
translation factor activity, nucleic acid binding	0.0739016	No
ENSG00000179899 subnetwork	0.0739774	No
DTNA subnetwork	0.0739843	No
LRRFIP2 subnetwork	0.0740031	No
SIN3A subnetwork	0.0740381	No
female infertility	0.074108	No
RPLP0 subnetwork	0.0741155	No
MYO18A subnetwork	0.0742476	No
REACTOME_APOPTOTIC_CLEAVAGE_OF_CELLULAR_PROTEINS	0.0743841	No
DNAJC3 subnetwork	0.0744039	No
PCBD1 subnetwork	0.0745169	No
cellular response to nutrient levels	0.0745882	No
shortened head	0.0747481	No
oxygen binding	0.0749002	No
SMARCC2 subnetwork	0.0749044	No
abnormal calcium ion homeostasis	0.074906	No
ENSG00000215755 subnetwork	0.0749642	No
APOC3 subnetwork	0.0749642	No
PKNOX1 subnetwork	0.0750161	No
ARPC3 subnetwork	0.0750373	No
lens development in camera-type eye	0.0752519	No
abnormal basement membrane morphology	0.0755323	No
abnormal muscle morphology	0.0755925	No
paternal imprinting	0.0756727	No
sympathetic nervous system development	0.0757656	No
UGDH subnetwork	0.0757736	No
abnormal joint morphology	0.0758034	No
TEK subnetwork	0.0758775	No
GPRIN2 subnetwork	0.0759256	No
regulation of heart morphogenesis	0.0759667	No
abnormal limb development	0.0761221	No
positive regulation of reactive oxygen species metabolic process	0.0761399	No
negative regulation of transforming growth factor beta receptor signaling pathway	0.0761695	No
KRT72 subnetwork	0.0762068	No
narrow eye opening	0.0762264	No
abnormal telencephalon development	0.076229	No
establishment of planar polarity of embryonic epithelium	0.0763341	No
HSPA1A subnetwork	0.076356	No
HSPA1B subnetwork	0.076356	No
ENSG00000215292 subnetwork	0.076356	No
ENSG00000212860 subnetwork	0.076356	No
HSPA1B subnetwork	0.076356	No
MLLT4 subnetwork	0.0763844	No
placenta blood vessel development	0.0764439	No
SUMO3 subnetwork	0.0764564	No
ANXA2 subnetwork	0.0764985	No
abnormal outer ear morphology	0.0765058	No
CUL2 subnetwork	0.0765125	No
TWF1 subnetwork	0.0765427	No
ARNT subnetwork	0.0765809	No
SERPINA5 subnetwork	0.0766033	No
RPL18 subnetwork	0.0766649	No
VANGL1 subnetwork	0.0766783	No
ERGIC3 subnetwork	0.0767276	No
DNAJC7 subnetwork	0.0768033	No
LRSAM1 subnetwork	0.0768189	No
extracellular matrix binding	0.0768625	No
VAMP7 subnetwork	0.0768804	No
protein serine/threonine kinase inhibitor activity	0.0769654	No
REACTOME_GLUCONEOGENESIS	0.0770116	No
basal plasma membrane	0.0770924	No
substrate adhesion-dependent cell spreading	0.077212	No
vasculogenesis	0.0772909	No
abnormal mesenchyme morphology	0.077322	No
muscle cell migration	0.077346	No
cardia bifida	0.0774078	No
CFB subnetwork	0.0774746	No
ENSG00000166285 subnetwork	0.0774746	No
abnormal pterygoid process morphology	0.0775119	No
IQGAP1 subnetwork	0.0775548	No
SCMH1 subnetwork	0.0775558	No
SKIL subnetwork	0.0776137	No
REACTOME_PLATELET_DEGRANULATION	0.0776775	No
increased circulating sodium level	0.0777275	No
positive regulation of cell differentiation	0.0777408	No
COL1A1 subnetwork	0.0777869	No
oxidoreductase activity, acting on paired donors, with incorporation or reduction of molecular oxygen, reduced flavin or flavoprotein as one donor, and incorporation of one atom of oxygen	0.0778211	No
complete embryonic lethality at implantation	0.077853	No
decreased length of long bones	0.0780426	No
ligand-dependent nuclear receptor binding	0.0780622	No
nucleus localization	0.0780971	No
lumbar vertebral transformation	0.0781176	No
ZNF292 subnetwork	0.0781271	No
NR2F2 subnetwork	0.0781488	No
TOPORS subnetwork	0.0781892	No
PIP5K1C subnetwork	0.0782771	No
F11R subnetwork	0.0783051	No
TP53 subnetwork	0.0784878	No
YWHAZ subnetwork	0.0786624	No
RPL24 subnetwork	0.0786829	No
abnormal exercise endurance	0.0786975	No
cellular response to extracellular stimulus	0.07873	No
CSPG4 subnetwork	0.0787853	No
small lung	0.078802	No
abnormal neural tube morphology/development	0.0788282	No
REACTOME_METABOLISM_OF_CARBOHYDRATES	0.0788395	No
dehydration	0.0789174	No
maintenance of protein localization to organelle	0.078986	No
HNRPDL subnetwork	0.0790177	No
COPS7A subnetwork	0.0790626	No
MAP2K2 subnetwork	0.0792013	No
abnormal malleus morphology	0.079228	No
regulation of mesenchymal cell proliferation	0.0793537	No
SMAD9 subnetwork	0.0794242	No
HNRNPH2 subnetwork	0.0794443	No
abnormal limb bone morphology	0.0795932	No
ATIC subnetwork	0.0796158	No
circling	0.079657	No
PGF subnetwork	0.0796851	No
RNF5 subnetwork	0.0796954	No
RNF5 subnetwork	0.0796954	No
ENSG00000206254 subnetwork	0.0796954	No
mesenchymal cell proliferation	0.0797179	No
KEGG_BASAL_CELL_CARCINOMA	0.0797834	No
DST subnetwork	0.0798209	No
PCBP2 subnetwork	0.0799014	No
CDH3 subnetwork	0.079944	No
CRB1 subnetwork	0.0800927	No
ADK subnetwork	0.0802124	No
open neural tube	0.0802627	No
EVPL subnetwork	0.0802821	No
KLF9 subnetwork	0.0803571	No
LIMK1 subnetwork	0.0803824	No
HDAC7 subnetwork	0.0808193	No
nerve development	0.0808594	No
CFHR4 subnetwork	0.0808932	No
MUC2 subnetwork	0.0810218	No
KPNA1 subnetwork	0.0810325	No
ENSG00000197558 subnetwork	0.0810487	No
ENSG00000127388 subnetwork	0.0810487	No
PAPOLA subnetwork	0.0811972	No
response to topologically incorrect protein	0.0813912	No
cartilage development involved in endochondral bone morphogenesis	0.0814231	No
MTHFD1 subnetwork	0.0814426	No
PRKG1 subnetwork	0.0815341	No
decreased birth body size	0.0815483	No
RBM10 subnetwork	0.0815753	No
SMAD protein complex assembly	0.0817364	No
abnormal pituitary diverticulum morphology	0.0817466	No
abnormal tail morphology	0.0817532	No
REACTOME_GRB2_EVENTS_IN_ERBB2_SIGNALING	0.0818072	No
morphogenesis of an epithelium	0.0818096	No
PPP1R3B subnetwork	0.0818117	No
multicellular organism growth	0.0818953	No
PLA2G4F subnetwork	0.0819075	No
RNPS1 subnetwork	0.0819244	No
UBE2D4 subnetwork	0.0819586	No
C8orf55 subnetwork	0.0821166	No
thrombosis	0.0821941	No
respiratory system development	0.0822156	No
pseudopodium	0.0824362	No
KDM2B subnetwork	0.0825628	No
REACTOME_GLYCOGEN_BREAKDOWN_GLYCOGENOLYSIS	0.0825761	No
SYNE1 subnetwork	0.0826134	No
maintenance of protein location	0.0827487	No
mesoderm morphogenesis	0.0828062	No
TAF1 subnetwork	0.0829088	No
GTPBP2 subnetwork	0.0829984	No
SH3BP4 subnetwork	0.0831304	No
abnormal presphenoid bone morphology	0.0831706	No
RLIM subnetwork	0.0831953	No
regulation of Wnt receptor signaling pathway	0.0832422	No
RPL14 subnetwork	0.0833269	No
SLC5A1 subnetwork	0.0833912	No
regulation of cell adhesion	0.0834389	No
SLC25A5 subnetwork	0.0834615	No
rib fusion	0.0835385	No
ULK3 subnetwork	0.0835621	No
COL4A3 subnetwork	0.0836313	No
PLAA subnetwork	0.0836801	No
CAV3 subnetwork	0.0837399	No
muscle organ development	0.0837791	No
double outlet heart right ventricle	0.0838028	No
REACTOME_SMOOTH_MUSCLE_CONTRACTION	0.0838074	No
dilated heart	0.0838406	No
ENSG00000013455 subnetwork	0.0838844	No
DAPK3 subnetwork	0.0839551	No
TSR1 subnetwork	0.0839607	No
dilated third ventricle	0.0840371	No
MUC13 subnetwork	0.0841844	No
E2F6 subnetwork	0.0842272	No
ENSG00000173534 subnetwork	0.0842619	No
ENSG00000170847 subnetwork	0.0842619	No
PTMA subnetwork	0.084281	No
abnormal nasal cavity morphology	0.0842965	No
small otic vesicle	0.0844272	No
CBX6 subnetwork	0.0844689	No
UBE2D2 subnetwork	0.0845149	No
respiratory tube development	0.0846432	No
ERBB3 subnetwork	0.0846497	No
abnormal blood coagulation	0.0846865	No
BSG subnetwork	0.0847205	No
striated muscle contraction	0.0847891	No
regulation of cell fate specification	0.0847932	No
FUS subnetwork	0.0848324	No
GFM1 subnetwork	0.0848603	No
TNS4 subnetwork	0.0848794	No
abnormal heart valve morphology	0.0849015	No
abnormal spleen red pulp morphology	0.0849371	No
REACTOME_PLATELET_ADHESION_TO_EXPOSED_COLLAGEN	0.0849589	No
PDIA4 subnetwork	0.085154	No
embryonic foregut morphogenesis	0.0852846	No
REACTOME_TRANSLATION	0.0852895	No
epithelial tube branching involved in lung morphogenesis	0.0852955	No
NR4A2 subnetwork	0.0853239	No
cell fate determination	0.0853752	No
ABCE1 subnetwork	0.0854097	No
NPAS3 subnetwork	0.0854142	No
MTAP subnetwork	0.0854192	No
TIAM1 subnetwork	0.0854431	No
endoplasmic reticulum-Golgi intermediate compartment	0.0854527	No
PCGF1 subnetwork	0.085455	No
actomyosin structure organization	0.0854848	No
SUPT6H subnetwork	0.0854944	No
KEGG_VIRAL_MYOCARDITIS	0.0855226	No
SNRNP70 subnetwork	0.0857105	No
MT3 subnetwork	0.0857368	No
SHROOM3 subnetwork	0.0857481	No
HSP90AA1 subnetwork	0.0858483	No
morphogenesis of a branching epithelium	0.0859586	No
abnormal semilunar valve morphology	0.0859643	No
REACTOME_SHC1_EVENTS_IN_ERBB2_SIGNALING	0.0859814	No
regulation of chondrocyte differentiation	0.0861547	No
positive regulation of Notch signaling pathway	0.0861795	No
MECR subnetwork	0.0863267	No
increased incidence of induced tumors	0.086372	No
EIF3K subnetwork	0.0863833	No
CFH subnetwork	0.0864493	No
CERS2 subnetwork	0.0864515	No
branching morphogenesis of a tube	0.0864655	No
ossification	0.086516	No
abnormal dermal layer morphology	0.0865551	No
DNAJA3 subnetwork	0.0866187	No
TNXB subnetwork	0.0866207	No
posttranscriptional gene silencing	0.086635	No
posttranscriptional gene silencing by RNA	0.086635	No
RBL2 subnetwork	0.0866361	No
small lens	0.0866501	No
kinase binding	0.0867973	No
TADA2A subnetwork	0.0868515	No
DISC1 subnetwork	0.0868588	No
short maxilla	0.0869913	No
limb bud formation	0.0870078	No
EGR1 subnetwork	0.0871136	No
PTK2B subnetwork	0.0871347	No
ENSG00000212802 subnetwork	0.087141	No
ENSG00000174766 subnetwork	0.087141	No
RPL37A subnetwork	0.0871764	No
CRADD subnetwork	0.0872372	No
BGN subnetwork	0.0872563	No
CTNNA2 subnetwork	0.087314	No
decreased cell proliferation	0.0873464	No
RPL12 subnetwork	0.087668	No
MCOLN3 subnetwork	0.0877745	No
abnormal dopaminergic neuron morphology	0.087792	No
ACTR3 subnetwork	0.0878518	No
VEGFC subnetwork	0.0878959	No
HBA1 subnetwork	0.0879859	No
HBA2 subnetwork	0.0879859	No
PGK1 subnetwork	0.0882487	No
erythrocyte development	0.0882924	No
protein kinase B signaling cascade	0.0885261	No
complete postnatal lethality	0.0885517	No
CAMK2D subnetwork	0.0885782	No
ENSG00000197621 subnetwork	0.0886624	No
abnormal rhombomere morphology	0.0886658	No
HDAC4 subnetwork	0.0886743	No
acanthosis	0.0887068	No
abnormal rib morphology	0.0887216	No
muscle degeneration	0.0887606	No
positive regulation of chemokine production	0.0887943	No
REACTOME_CREB_PHOSPHORYLATION_THROUGH_THE_ACTIVATION_OF_CAMKII	0.0888495	No
water transmembrane transporter activity	0.0888636	No
SGCD subnetwork	0.0888818	No
DUSP7 subnetwork	0.0889144	No
GARS subnetwork	0.0890409	No
proteoglycan binding	0.0893043	No
corneal vascularization	0.0893247	No
NCOA3 subnetwork	0.0893316	No
lung development	0.0893699	No
cysteine-type endopeptidase regulator activity involved in apoptotic process	0.0894016	No
IARS2 subnetwork	0.0894385	No
FXR2 subnetwork	0.0894721	No
PAX6 subnetwork	0.089633	No
RPL35 subnetwork	0.0899194	No
cryptorchism	0.0900407	No
increased erythrocyte cell number	0.0900716	No
PIP5K1B subnetwork	0.0901289	No
GEMIN5 subnetwork	0.0902034	No
MSX1 subnetwork	0.0904033	No
pallor	0.0905873	No
abnormal embryonic growth/weight/body size	0.0905881	No
GAN subnetwork	0.0907082	No
PCID2 subnetwork	0.0907179	No
abnormal basioccipital bone morphology	0.0907602	No
decreased fetal size	0.090885	No
abnormal forelimb morphology	0.0909504	No
RECQL5 subnetwork	0.091003	No
viral reproductive process	0.0910178	No
integrin binding	0.0910429	No
PCDH1 subnetwork	0.0911621	No
ACTR3B subnetwork	0.0912317	No
increased systemic arterial diastolic blood pressure	0.091262	No
interrupted aortic arch	0.0913057	No
obese	0.0913471	No
RNA polymerase II regulatory region DNA binding	0.0913689	No
eye inflammation	0.0913742	No
organ formation	0.0914836	No
TBC1D25 subnetwork	0.0915012	No
hypertension	0.091681	No
scaly skin	0.0918154	No
trabecula morphogenesis	0.0918491	No
GSPT1 subnetwork	0.0918497	No
BEGAIN subnetwork	0.0920112	No
MYLK subnetwork	0.0920551	No
RNA polymerase II core promoter proximal region sequence-specific DNA binding transcription factor activity involved in positive regulation of transcription	0.092125	No
PCGF6 subnetwork	0.0921787	No
cell-cell junction	0.0922254	No
abnormal atrioventricular cushion morphology	0.092273	No
SMARCA2 subnetwork	0.0923058	No
abnormal fetal cardiomyocyte proliferation	0.0923498	No
dystrophin-associated glycoprotein complex	0.092488	No
LEFTY2 subnetwork	0.0927222	No
BMPR1B subnetwork	0.0927492	No
cytosolic part	0.0927565	No
KEGG_LINOLEIC_ACID_METABOLISM	0.0929361	No
protein complex binding	0.0929745	No
skeletal system development	0.0930051	No
decreased bone strength	0.0930198	No
abnormal fourth branchial arch artery morphology	0.0930252	No
abnormal vas deferens morphology	0.0931965	No
actin filament binding	0.0932011	No
HSPB8 subnetwork	0.0932093	No
ASPSCR1 subnetwork	0.0932301	No
central nervous system neuron axonogenesis	0.0932655	No
NKX2-1 subnetwork	0.0933662	No
abnormal trophoblast giant cells	0.0934902	No
OPRD1 subnetwork	0.093532	No
POLR2B subnetwork	0.0935344	No
DAXX subnetwork	0.0936448	No
DAXX subnetwork	0.0936448	No
DAXX subnetwork	0.0936448	No
abnormal palatal shelf fusion at midline	0.0936779	No
absent heartbeat	0.0937769	No
SMU1 subnetwork	0.0938314	No
PLEKHA3 subnetwork	0.0939418	No
increased cardiac muscle contractility	0.0939915	No
protein kinase C binding	0.0940268	No
REACTOME_FORMATION_OF_THE_TERNARY_COMPLEX_AND_SUBSEQUENTLY_THE_43S_COMPLEX	0.0941066	No
nuclear cataracts	0.0941738	No
THOC6 subnetwork	0.0942014	No
SEPT9 subnetwork	0.0942136	No
FBL subnetwork	0.0942655	No
response to nutrient levels	0.0942664	No
ADRM1 subnetwork	0.0942726	No
negative regulation of developmental process	0.0943168	No
SH3BP5 subnetwork	0.0943667	No
CIT subnetwork	0.0943874	No
EPHA3 subnetwork	0.0944701	No
HOMER2 subnetwork	0.0945993	No
PLAGL1 subnetwork	0.0946485	No
STRADB subnetwork	0.094684	No
OTX2 subnetwork	0.0947125	No
SIRT1 subnetwork	0.0947376	No
RNA polymerase II regulatory region sequence-specific DNA binding	0.0947744	No
negative regulation of cell differentiation	0.0948034	No
PPP1CC subnetwork	0.0948295	No
PFDN4 subnetwork	0.0948503	No
abnormal small intestine morphology	0.0948902	No
REACTOME_SEMA3A:PLEXIN_REPULSION_SIGNALING_BY_INHIBITING_INTEGRIN_ADHESION	0.0948927	No
SLC25A4 subnetwork	0.0949619	No
impaired muscle relaxation	0.094985	No
DNAJC5 subnetwork	0.0951284	No
MYO5B subnetwork	0.095148	No
small nuclear ribonucleoprotein complex	0.095173	No
KIF5B subnetwork	0.0951914	No
TJP2 subnetwork	0.0952469	No
thymus development	0.0953362	No
pulmonary hypoplasia	0.0953696	No
NSMCE1 subnetwork	0.0954122	No
PI4KB subnetwork	0.0954345	No
HNRNPA2B1 subnetwork	0.0955087	No
P4HB subnetwork	0.0955401	No
LDOC1 subnetwork	0.0955605	No
neonatal lethality	0.0955941	No
translation initiation factor activity	0.0956927	No
DENND4A subnetwork	0.095695	No
UBE2E3 subnetwork	0.0957154	No
SFRP5 subnetwork	0.0957997	No
SFRP4 subnetwork	0.0957997	No
SFRP1 subnetwork	0.0957997	No
protein self-association	0.0958124	No
MYOG subnetwork	0.0958835	No
abnormal muscle fiber morphology	0.0959079	No
ANGPT1 subnetwork	0.0959139	No
MAPK1 subnetwork	0.0959564	No
NAA15 subnetwork	0.0959932	No
cardiac septum development	0.0959976	No
SCYL2 subnetwork	0.0960206	No
basal part of cell	0.0960264	No
RBX1 subnetwork	0.0960911	No
regulation of G2/M transition of mitotic cell cycle	0.0960981	No
RACGAP1 subnetwork	0.0961187	No
PPP1R12B subnetwork	0.0961765	No
RHPN2 subnetwork	0.0962594	No
regulation of the force of heart contraction	0.0962728	No
abnormal alisphenoid bone morphology	0.0964668	No
abnormal olfactory epithelium morphology	0.0965547	No
decreased erythrocyte cell number	0.096608	No
ACTN2 subnetwork	0.0966828	No
transmembrane receptor protein tyrosine kinase activity	0.0967698	No
cell fate commitment	0.0968087	No
KRT5 subnetwork	0.0968301	No
REACTOME_ACTIVATED_TAK1_MEDIATES_P38_MAPK_ACTIVATION	0.0968448	No
PXN subnetwork	0.0968802	No
ATXN2L subnetwork	0.0970404	No
decreased rib number	0.0970439	No
regulation of neural precursor cell proliferation	0.097183	No
small epididymis	0.0972014	No
RXRA subnetwork	0.0974602	No
UBE2R2 subnetwork	0.0974627	No
aromatase activity	0.0974665	No
regulation of cysteine-type endopeptidase activity involved in apoptotic process	0.0974716	No
increased lung weight	0.097562	No
transferase activity, transferring nitrogenous groups	0.0978603	No
beta-catenin binding	0.0979402	No
CAMK2A subnetwork	0.0980381	No
KIAA0232 subnetwork	0.0980566	No
DDX21 subnetwork	0.0980703	No
response to extracellular stimulus	0.0981419	No
HIST1H2AE subnetwork	0.0981702	No
HIST1H2AB subnetwork	0.0981702	No
ADAM22 subnetwork	0.0982571	No
abnormal skeletal muscle morphology	0.0982912	No
abnormal digit morphology	0.0983066	No
MAML3 subnetwork	0.0984388	No
leukemia	0.0984758	No
ITCH subnetwork	0.098638	No
PARD3 subnetwork	0.0987034	No
abnormal basicranium morphology	0.0987219	No
smooth muscle cell differentiation	0.0987593	No
TIA1 subnetwork	0.0987847	No
OSBPL3 subnetwork	0.0988161	No
NINL subnetwork	0.0988251	No
core promoter proximal region sequence-specific DNA binding	0.098832	No
ATP2C1 subnetwork	0.0988382	No
ATP5B subnetwork	0.0989048	No
abnormal vascular smooth muscle physiology	0.0989177	No
MYH7 subnetwork	0.0990105	No
MEF2C subnetwork	0.0990516	No
positive regulation of neuron apoptotic process	0.0991981	No
KEGG_ARGININE_AND_PROLINE_METABOLISM	0.0992044	No
positive regulation of viral reproduction	0.0992072	No
myofibril assembly	0.0992516	No
short sternum	0.099255	No
BCAP31 subnetwork	0.099272	No
KEGG_PATHWAYS_IN_CANCER	0.0992921	No
abnormal frontal bone morphology	0.099334	No
AP1M1 subnetwork	0.0993362	No
PTPN3 subnetwork	0.0994793	No
partial prenatal lethality	0.0995191	No
MED15 subnetwork	0.0996044	No
PDLIM5 subnetwork	0.099637	No
TRIM28 subnetwork	0.0996533	No
HIST1H2AK subnetwork	0.0997323	No
HIST1H2AD subnetwork	0.0997323	No
HIST1H2AG subnetwork	0.0997323	No
HIST1H2AL subnetwork	0.0997323	No
HIST1H2AI subnetwork	0.0997323	No
ZFP36 subnetwork	0.0997514	No
RPL19 subnetwork	0.0998011	No
increased apoptosis	0.099836	No
PHF10 subnetwork	0.100248	No
bone morphogenesis	0.100261	No
PBX1 subnetwork	0.100405	No
SFXN3 subnetwork	0.100606	No
ENSG00000215719 subnetwork	0.100624	No
CLCA1 subnetwork	0.100709	No
REPS1 subnetwork	0.100753	No
CPSF2 subnetwork	0.100781	No
REACTOME_INFLUENZA_VIRAL_RNA_TRANSCRIPTION_AND_REPLICATION	0.100785	No
MAPKAPK5 subnetwork	0.100812	No
pregnancy-related premature death	0.10091	No
C12orf10 subnetwork	0.100926	No
muscle contraction	0.100937	No
non-canonical Wnt receptor signaling pathway	0.101034	No
RPS24 subnetwork	0.101156	No
FABP1 subnetwork	0.101165	No
SNW1 subnetwork	0.10128	No
small kidney	0.101288	No
TCOF1 subnetwork	0.101303	No
TALDO1 subnetwork	0.101407	No
negative regulation of binding	0.101456	No
teratozoospermia	0.101595	No
EYA3 subnetwork	0.101595	No
DUSP16 subnetwork	0.101598	No
curly tail	0.101671	No
abnormal cartilage morphology	0.101735	No
abnormal interparietal bone morphology	0.101811	No
ENSG00000137379 subnetwork	0.101818	No
TUBB subnetwork	0.101818	No
TUBB subnetwork	0.101818	No
IKBKE subnetwork	0.101837	No
RPN2 subnetwork	0.101879	No
MYO1E subnetwork	0.101894	No
REACTOME_HEMOSTASIS	0.10196	No
calmodulin-dependent protein kinase activity	0.102045	No
membrane raft	0.10212	No
positive regulation of blood coagulation	0.102208	No
increased dopamine level	0.102221	No
regulation of Rac protein signal transduction	0.102269	No
CIC subnetwork	0.102294	No
RPS3A subnetwork	0.102401	No
abnormal incus morphology	0.102467	No
decreased circulating progesterone level	0.102517	No
CDK8 subnetwork	0.102532	No
small adrenal glands	0.102891	No
RHOB subnetwork	0.103168	No
KIAA0930 subnetwork	0.10322	No
MAST2 subnetwork	0.103294	No
STK11 subnetwork	0.103302	No
ENOX1 subnetwork	0.103328	No
TRIM32 subnetwork	0.103426	No
abnormal crista ampullaris neuroepithelium morphology	0.103449	No
viral transcription	0.103471	No
viral genome expression	0.103471	No
SVIL subnetwork	0.103519	No
retinal ganglion cell axon guidance	0.103635	No
UBE2N subnetwork	0.103652	No
NME2 subnetwork	0.10367	No
gastrulation	0.103724	No
GATA1 subnetwork	0.103731	No
RARA subnetwork	0.103866	No
HNRNPA1 subnetwork	0.103887	No
heart contraction	0.103978	No
SF3B3 subnetwork	0.103992	No
IGFBP7 subnetwork	0.104036	No
glycoprotein binding	0.104068	No
HNRNPD subnetwork	0.104439	No
TTPA subnetwork	0.10446	No
abnormal allantois morphology	0.104471	No
embryonic organ development	0.104574	No
GYS1 subnetwork	0.104589	No
CDK13 subnetwork	0.104703	No
abnormal brain commissure morphology	0.104711	No
ELP2 subnetwork	0.104738	No
actin filament-based movement	0.104887	No
KXD1 subnetwork	0.104969	No
LTF subnetwork	0.105111	No
abnormal ulna morphology	0.10517	No
PIK3R5 subnetwork	0.10526	No
microphthalmia	0.10526	No
PPFIA2 subnetwork	0.105532	No
SAMD4A subnetwork	0.105614	No
delayed endochondral bone ossification	0.105699	No
regulation of transcription regulatory region DNA binding	0.105864	No
COL17A1 subnetwork	0.105896	No
ZHX1 subnetwork	0.105931	No
PPP1R3A subnetwork	0.105962	No
abnormal digit development	0.105966	No
absent trabeculae carneae	0.106033	No
extracellular matrix part	0.10604	No
DGKG subnetwork	0.106064	No
CDK19 subnetwork	0.106067	No
REACTOME_PI3K_EVENTS_IN_ERBB2_SIGNALING	0.106111	No
abnormal ear development	0.106111	No
right aortic arch	0.106159	No
negative regulation of DNA binding	0.106164	No
DLX2 subnetwork	0.106267	No
abnormal embryonic hematopoiesis	0.10629	No
omphalocele	0.106331	No
F7 subnetwork	0.106338	No
filamentous actin	0.106359	No
UBA1 subnetwork	0.106418	No
abnormal megakaryocyte progenitor cell morphology	0.106423	No
TAF7 subnetwork	0.106753	No
abnormal zygomatic bone morphology	0.106817	No
ALDH16A1 subnetwork	0.107124	No
GSN subnetwork	0.10719	No
RPL11 subnetwork	0.107485	No
MYL12A subnetwork	0.107544	No
abnormal lens epithelium morphology	0.107663	No
SRC subnetwork	0.107709	No
AMFR subnetwork	0.107901	No
PCF11 subnetwork	0.108135	No
MARK3 subnetwork	0.108178	No
epithelial cell proliferation	0.108205	No
LYAR subnetwork	0.108331	No
TOP2B subnetwork	0.108352	No
abnormal embryonic erythropoiesis	0.108387	No
RPL39 subnetwork	0.108431	No
SERPINH1 subnetwork	0.108446	No
TLN2 subnetwork	0.108473	No
distended pericardium	0.108649	No
abnormal parietal bone morphology	0.108709	No
PIP4K2A subnetwork	0.10882	No
SMAD5 subnetwork	0.108855	No
ER-nucleus signaling pathway	0.108865	No
REACTOME_DEVELOPMENTAL_BIOLOGY	0.108873	No
RND1 subnetwork	0.109023	No
ephrin receptor activity	0.109209	No
NEDD4L subnetwork	0.109387	No
ENSG00000182367 subnetwork	0.10947	No
CSE1L subnetwork	0.109489	No
failure of initiation of embryo turning	0.109513	No
EIF4H subnetwork	0.109581	No
regulation of endothelial cell differentiation	0.109606	No
TNK1 subnetwork	0.109621	No
abnormal motor capabilities/coordination/movement	0.109665	No
herniated abdominal wall	0.109736	No
STAT4 subnetwork	0.109826	No
DICER1 subnetwork	0.110045	No
neuron projection membrane	0.110163	No
abnormal thyroid cartilage morphology	0.110163	No
BTAF1 subnetwork	0.110182	No
laminin binding	0.110182	No
PTOV1 subnetwork	0.110223	No
PTEN subnetwork	0.110233	No
morphogenesis of a polarized epithelium	0.110272	No
TSC2 subnetwork	0.110293	No
negative regulation of cell-substrate adhesion	0.110338	No
SENP3 subnetwork	0.110691	No
head development	0.110792	No
TCERG1 subnetwork	0.110955	No
post-embryonic development	0.110977	No
PIK3R4 subnetwork	0.11101	No
SLC2A1 subnetwork	0.111016	No
RERE subnetwork	0.111169	No
UBR1 subnetwork	0.111353	No
central nervous system neuron development	0.111381	No
large ribosomal subunit	0.111409	No
biomineral tissue development	0.111437	No
mesoderm formation	0.111445	No
ACVR2B subnetwork	0.111466	No
KRT9 subnetwork	0.111522	No
negative regulation of chondrocyte differentiation	0.11157	No
REACTOME_INFLUENZA_INFECTION	0.111572	No
RPL5 subnetwork	0.111601	No
RND3 subnetwork	0.111644	No
[truncated: 12,464 more rows]

[truncated: 7 more sheets: S10, S11, S12, S13, S14, S15, S16]
